ATGL protects against renal dysfunction

# Adipose Triglyceride Lipase protects the endocytosis of renal cells on a high fat diet in *Drosophila*

Aleksandra Lubojemska<sup>1</sup>, M. Irina Stefana<sup>1,2</sup>, Lena Lampe<sup>1</sup>, Azumi Yoshimura<sup>3</sup>, Alana Burrell<sup>3</sup>, Lucy Collinson<sup>3</sup> and Alex P. Gould<sup>1\*</sup>

<sup>1</sup>Physiology and Metabolism Laboratory, The Francis Crick Institute, Midland Road, London, NW1 1AT, UK

<sup>2</sup>Current address: Wellcome Centre for Human Genetics, University of Oxford, OX3 7BN, UK

<sup>3</sup>Electron Microscopy Science Technology Platform, The Francis Crick Institute, Midland Road, London, NW1 1AT, UK

\*Correspondence to: [Alex.Gould@crick.ac.uk](mailto:Alex.Gould@crick.ac.uk)

## ATGL protects against renal dysfunction

### 1 Abstract

2 Obesity-related renal lipotoxicity and chronic kidney disease (CKD) are prevalent pathologies  
3 with complex aetiologies. One hallmark of renal lipotoxicity is the ectopic accumulation of  
4 lipid droplets in kidney podocytes and in proximal tubule cells. Renal lipid droplets are  
5 observed in human CKD patients and in high-fat diet rodent models but their precise role  
6 remains unclear. Here, we establish a high-fat diet model in *Drosophila* that recapitulates renal  
7 lipid droplets and several other aspects of mammalian CKD. Cell-type specific genetic  
8 manipulations show that lipid can overflow from adipose tissue and is taken up by renal cells  
9 called nephrocytes. A high-fat diet drives nephrocyte lipid uptake via the multiligand receptor  
10 Cubilin, leading to the ectopic accumulation of lipid droplets. These nephrocyte lipid droplets  
11 correlate with ER and mitochondrial deficits, as well as with impaired macromolecular  
12 endocytosis, a key conserved function of renal cells. Nephrocyte knockdown of diglyceride  
13 acyltransferase 1 (DGAT1), overexpression of adipose triglyceride lipase (ATGL) and epistasis  
14 tests together reveal that fatty acid flux through the lipid droplet triglyceride compartment  
15 protects the ER, mitochondria and endocytosis of renal cells. Strikingly, boosting nephrocyte  
16 expression of the lipid droplet resident enzyme ATGL is sufficient to rescue high-fat diet  
17 induced defects in renal endocytosis. Moreover, endocytic rescue requires a conserved  
18 mitochondrial regulator, peroxisome proliferator-activated receptor-gamma coactivator 1 $\alpha$   
19 (PGC1 $\alpha$ ). This study demonstrates that lipid droplet lipolysis counteracts the harmful effects  
20 of a high-fat diet via a mitochondrial pathway that protects renal endocytosis. It also provides  
21 a genetic strategy for determining whether lipid droplets in different biological contexts  
22 function primarily to release beneficial or to sequester toxic lipids.

## ATGL protects against renal dysfunction

### 23 Introduction

24 In diabetic patients, hyperglycemia triggers complex hemodynamic, metabolic and  
25 inflammatory changes that can lead to a constellation of renal dysfunctions termed diabetic  
26 nephropathy [1,2]. Obesity is a major risk factor for type 2 diabetes and it is thought that once  
27 adipose tissue has expanded to its maximum storage capacity, excess lipids then overflow into  
28 the bloodstream and trigger lipotoxicity in the kidney and in other peripheral tissues [3-6].  
29 Several mechanisms are thought to contribute to renal lipotoxicity and chronic kidney disease  
30 (CKD). For example, the adipo-renal axis is deregulated such that an altered blend of adipokines  
31 and other adipose-derived factors produces renal inflammation, fibrosis and oxidative stress,  
32 leading to defective glomerular filtration and proteinuria [7,8]. Adipose-derived factors as well  
33 as ectopic lipid accumulation in the kidney are thought to impact multiple podocyte, endothelial  
34 and proximal tubule functions, at least in part via the promotion of renal insulin resistance [9].  
35 Rodent studies using a high fat diet (HFD) have provided valuable insights into the links  
36 between lipotoxicity and CKD. In mice, HFD is sufficient to trigger features of stress and  
37 damage in mouse proximal tubule cells, including the endoplasmic reticulum unfolded protein  
38 response, lipid peroxidation, and defective albumin reabsorption [10-13]. In both human  
39 patients and mouse models, mitochondrial loss and dysfunction are central to the development  
40 and progression of CKD [14]. The underlying abnormalities include decreased mitochondrial  
41 biogenesis, loss of mitochondrial membrane potential, decreased ATP generation and altered  
42 levels of reactive oxygen species (ROS).

43  
44 One hallmark of CKD lipotoxicity is the accumulation of lipid droplets in podocytes and in  
45 proximal tubule epithelial cells. Lipid droplets are intracellular organelles comprising a core of  
46 neutral lipids, such as triglycerides, surrounded by a polar lipid monolayer containing many  
47 different proteins, some of which function in lipid metabolism [15,16]. Nascent lipid droplets  
48 form via a complex process involving neutral lipid synthesis by endoplasmic reticulum (ER)  
49 enzymes such as diglyceride acyltransferase 1 (DGAT1) [17,18]. The neutral lipids stored in  
50 lipid droplets can then be broken down by lipolysis, mediated via lipid droplet-associated  
51 enzymes such as adipose triglyceride lipase (ATGL) [19]. This catabolic process is distinct  
52 from lipophagy, which involves lysosomal acid lipase acting upon lipids delivered to  
53 autolysosomes via autophagy [20]. As early as the 1930s, lipid droplets were observed as a sign  
54 of pathology in podocytes and in proximal tubule cells during renal disease [21,22], yet it has  
55 remained unclear whether they play a protective or a harmful role. Resolution of this question  
56 is important for understanding CKD mechanisms and will likely require *in vivo* studies of HFD

## ATGL protects against renal dysfunction

57 animal models with cell-type specific manipulations of enzymes that directly regulate the  
58 neutral lipid cargo of droplets rather than acting on other aspects of fatty acid metabolism.  
59 ATGL is of particular interest here as its specific function in renal cells in HFD and other CKD  
60 mouse models is not yet clear, although whole-body knockouts fed a standard diet are known  
61 to display proximal tubule damage and podocyte apoptosis [23,24].

62

63 The animal model *Drosophila* has powerful genetics for studying the molecular pathogenesis  
64 of some human diseases. This approach is possible because of extensive physiological  
65 similarities between major fly and human organs, including the kidney [25]. In *Drosophila*, the  
66 renal system comprises two anatomically distinct components - Malpighian tubules and  
67 nephrocytes [26-28] (**Fig 1A**). Malpighian tubules are excretory cells that also function in salt  
68 and water balance, similar to mammalian renal tubules [29,30]. Nephrocytes are podocyte-like  
69 cells that regulate the composition of the hemolymph (blood) via a filtration barrier consisting  
70 of Sns and Kirre, orthologs of the mammalian slit diaphragm proteins Nephrin and Neph1  
71 [31,32]. Nephrocytes also function like mammalian proximal tubule cells, efficiently  
72 reabsorbing macromolecules via a Cubilin-dependent endocytic receptor complex [33,34].  
73 *Drosophila* has thus been used to model several monogenic kidney diseases including steroid-  
74 resistant nephrotic syndrome and renal Fanconi syndrome [34,35]. Previous work using  
75 *Drosophila* has also shown that chronic high dietary sugar during adulthood increases O-  
76 GlycNAcylation, in turn leading to decreased Sns expression and compromised nephrocyte  
77 function [36]. Here we establish a *Drosophila* HFD model that recapitulates in nephrocytes the  
78 ectopic lipid droplets and cellular dysfunction observed in CKD. This CKD model is then  
79 interrogated with cell-type specific genetics and assays for mitochondria and endocytic function  
80 to pinpoint the role of lipid droplets in renal lipotoxicity. Genetic rescues and other approaches  
81 are then used to test whether lipid droplet enzymes are necessary and sufficient to ameliorate  
82 multiple aspects of renal dysfunction induced by HFD exposure.



## ATGL protects against renal dysfunction

### 83 Results

#### 84 HFD induces lipid droplets and abnormal nephrocyte ER and mitochondria

85 We established a *Drosophila* model for diet-induced renal lipotoxicity by raising animals on a  
86 high fat diet (HFD) throughout larval development (0-90 h after hatching, see Methods) (**Fig**  
87 **1B**). Compared to standard diet (STD), HFD did not significantly alter body growth or  
88 developmental timing but it did lead to a small increase in the size of nephrocytes (**S1A-S1C**  
89 **Fig**). To begin characterising the effects of HFD on nephrocytes, a neutral lipid dye (LipidTOX)  
90 was used to reveal that lipid droplets in pericardial nephrocytes are sparse in STD animals but  
91 strikingly abundant in HFD animals (**Fig 1C**). GFP fused to lipid droplet associated hydrolase  
92 (LDAH) localizes to the endoplasmic reticulum (ER) and to the surface of lipid droplets [37].  
93 In STD animals, *Dot-GAL4* driven expression of LDAH (*Dot>LDAH::GFP*) specifically in  
94 nephrocytes was mostly ER-associated but, in HFD larvae, it predominantly localized to the  
95 surface of 1-2  $\mu\text{m}$  diameter lipid droplets that stain strongly with the neutral lipid dye (**Fig 1D**).  
96 Hence, chronic exposure to HFD leads to the strong accumulation of nephrocyte lipid droplets.  
97 We also observed that HFD markedly decreased the overall volume of ER and mitochondria in  
98 nephrocytes, approximately halving the proportion of the total cell volume that each organelle  
99 occupies (**Fig 1E**). These observations together show that HFD in *Drosophila*, as in mammals,  
100 induces renal lipid droplets and also a deficit in ER and mitochondrial volumes.

101

#### 102 **Fig 1: High fat diet (HFD) induces lipid droplets and decreases ER and mitochondria in** 103 **nephrocytes.**

104 (A) Diagram comparing the mammalian nephron and the *Drosophila* renal system. *Drosophila*  
105 nephrocytes share functions with mammalian kidney podocytes and proximal tubules.  
106 *Drosophila* Malpighian tubules are functionally analogous to renal tubules.

107 (B) For the chronic dietary model, larvae are fed either a standard diet (STD) or a high fat diet  
108 (HFD) throughout development. The chronic genetic model for lipid overflow on STD utilises  
109 a fat-body specific GAL4 driver (*Lpp-GAL4*) to compare fat body overexpression of ATGL  
110 (*Lpp>ATGL*) with the control genotype (*Lpp>ctrl*).

111 (C) Lipid droplets (LDs), stained with a neutral lipid dye (LipidTOX), are more abundant in  
112 pericardial nephrocytes (dashed outlines) of HFD than STD larvae. Graph quantifies % of  
113 nephrocyte volume occupied by lipid droplets in STD and HFD larvae. In this and subsequent  
114 graphs, the boxplot encompasses the first to third quartile and shows the median, and whiskers  
115 extend from the hinge by 1.5x inter-quartile range. Data points are coloured according to which  
116 independent experiment they are from. Data were statistically analysed using linear mixed  
117 models (LMMs) followed by a Wald Chi-Squared test. Asterisks show statistical significance  
118 (\*  $p < 0.05$ , \*\*  $p < 0.005$ , \*\*\*  $p < 0.0005$ ) and ns indicates  $p > 0.05$  in this and all subsequent graphs.  
119 See **Table S1** for details of p values and the type of LMM used for all graphs in this study.  
120 Scale bar = 50  $\mu\text{m}$ .

121 (D) In pericardial nephrocytes (dashed outlines), LDAH::GFP localizes primarily to the ER  
122 (marked with anti-KDEL antibody) in STD larvae but to the surface of ER-associated lipid

## ATGL protects against renal dysfunction

123 droplets (marked with the neutral lipid dye LipidTOX) in HFD larvae. Note that LDAH::GFP  
124 induces clustering of lipid droplets [37].

125 (E) Low and high magnification views of pericardial nephrocytes (dotted outlines) from STD  
126 and HFD larvae, showing that HFD decreases mitochondria (marked with anti-ATP5A) and  
127 endoplasmic reticulum (ER, marked with anti-KDEL) but increases lipid droplets (marked with  
128 LipidTOX). Quantitations of ER and mitochondrial volumes are shown as a % of nephrocyte  
129 volume in STD and HFD larvae.

130

131

### 132 HFD compromises nephrocyte endocytosis

133 An important function of nephrocytes is to resorb circulating proteins and other  
134 macromolecules from the hemolymph via Cubilin and Amnionless dependent endocytosis  
135 [31,33]. This nephrocyte endocytic function can be quantified by monitoring *ex vivo* uptake of  
136 the polysaccharide dextran [31]. A combination of fluorescently labelled 10 kDa and 500 kDa  
137 dextrans has previously been used to assess size-selective filtration as well as overall  
138 endocytosis [31]. Using this approach, we measured mean dextran intensities in nephrocytes  
139 but observed only a modest increase in the 500:10 kDa dextran intensity ratio over an *ex vivo*  
140 incubation timecourse of 3 to 20 min (S2 Fig). A 30 min *ex vivo* incubation time was therefore  
141 subsequently used as a robust readout for nephrocyte endocytosis rather than size-selective  
142 filtration. This assay revealed that endocytic uptake of dextran is decreased in the nephrocytes  
143 of HFD animals and, although there is cell-to-cell variability, the mean overall reduction is  
144 ~50% compared with STD animals (Fig 2A and 2B). This finding is further strengthened by a  
145 modified *ex vivo* nephrocyte uptake assay that utilised labelled albumin. As with dextran,  
146 nephrocyte accumulation of albumin was significantly decreased by HFD (Fig 2C and 2D).  
147 We therefore conclude that HFD compromises the key renal function of nephrocyte  
148 endocytosis.

149

### 150 Fig 2: HFD decreases nephrocyte uptake of dextran and albumin.

151 (A-B) Dextran uptake assay. (A) Nephrocytes from STD and HFD larvae shown after *ex vivo*  
152 incubation with labelled 10 kDa (magenta) and 500 kDa (green) dextran. Bottom row shows  
153 same field of view with lipid droplets revealed with a neutral lipid stain (LipidTOX).  
154 Dashed outlines indicate the positions of all nephrocytes in the bottom row but only those that  
155 show weak dextran uptake in the top row. (B) Graph shows that uptake of both 10 kDa  
156 (magenta) and 500 kDa (green) dextran is significantly higher on STD than on HFD  
157 ( $p < 0.0005$ ). Scale bar = 30  $\mu\text{m}$ .

158 (C-D) Albumin uptake assay. (C) Nephrocytes from STD and HFD larvae shown after *ex vivo*  
159 incubation with labelled bovine serum albumin (FITC-BSA). Bottom row shows same field of  
160 view with lipid droplets revealed with a neutral lipid stain (LipidTOX). Dashed outlines  
161 indicate the positions of all nephrocytes in the bottom row but only those that show weak  
162 albumin uptake in the top row. (D) Graph shows that uptake of albumin is significantly higher  
163 on STD than HFD ( $p < 0.0005$ ). Scale bar = 50  $\mu\text{m}$ .

164

## ATGL protects against renal dysfunction

165 To determine the ultrastructural changes associated with HFD compromised endocytosis, we  
166 used correlative light electron microscopy (CLEM) with Airyscan confocal microscopy and  
167 serial blockface scanning electron microscopy (SBF SEM). The plasma membrane of  
168 nephrocytes is organised into a dense undulating network of slit diaphragms and lacunae  
169 [31,32,38]. These ultrastructural features of the plasma membrane network are visible with  
170 serial blockface scanning electron microscopy (SBF SEM) in both STD and HFD nephrocytes  
171 (**Fig 3A**). CLEM analysis of nephrocytes carrying the endogenous *Rab7* gene tagged with  
172 *YFP<sup>myc</sup>*, *Rab7::YFP<sup>myc</sup>* [*YRab7*, 39], distinguished five endolysosomal compartments according  
173 to the "white", "light" or "dark" SEM luminal density, and the Dextran and Rab7 labelling status  
174 (**Fig 3A and S3 Fig**). Comparing our CLEM analysis with previous nephrocyte studies [40-  
175 42], strongly suggested that the "white" compartment corresponds to a mix of Dextran<sup>+</sup>Rab7<sup>-</sup>  
176 early endosomes and Dextran<sup>+</sup>Rab7<sup>+</sup> endosomes (alpha-vacuoles). The "light" compartment  
177 encompasses Dextran<sup>+</sup>Rab7<sup>+</sup> endosomes and Dextran<sup>-</sup>Rab7<sup>+</sup> late endosomes (beta-vacuoles),  
178 whereas the "dark" compartment included both Dextran<sup>-</sup>Rab7<sup>+</sup> late endosomes and Dextran<sup>-</sup>  
179 Rab7<sup>-</sup> lysosomes. Based on this CLEM classification, the "white" and "light" compartments  
180 were segmented from the SBF SEM stacks of entire nephrocyte cells to provide the size  
181 distributions of endosomes. This segmentation approach revealed that HFD nephrocytes have  
182 substantially fewer endosomes than STD nephrocytes (**Fig 3B**). This HFD deficit is particularly  
183 striking for endosomes of less than 1µm in diameter and it is likely to account for the observed  
184 decrease in the capacity of nephrocytes to uptake macromolecules such as dextran.

185

### 186 **Fig 3. HFD decreases the number of nephrocyte endosomes.**

187 (A) CLEM images of midsections of STD and HFD nephrocytes expressing *Rab7::YFP<sup>myc</sup>* and  
188 labelled with Alexa Fluor 568 10kDa dextran. Scale bars are 5µm.

189 (B) Distribution of endosome number versus diameter for one STD and one HFD nephrocyte  
190 segmented by SBF SEM according to the "white" and "light" classifications in S3A Fig.

191

192 We have provided evidence demonstrating that HFD induces a syndrome of nephrocyte  
193 abnormalities including induction of lipid droplets and deficits in the endoplasmic reticulum,  
194 mitochondria and endocytic compartment. Many of these abnormalities are strikingly similar  
195 to those observed in the proximal tubule cells of HFD mice and CKD patients. This establishes  
196 the *Drosophila* HFD paradigm as a useful model for kidney disease. We next combined our  
197 new animal model with cell-type specific genetic manipulations in order to identify the  
198 mechanisms linking high dietary lipid to nephrocyte dysfunction. In particular, we focused on  
199 the role of lipid droplets, determining whether they are beneficial or harmful for renal function.

200

## ATGL protects against renal dysfunction

### 201 **Renal lipid droplets can be induced via adipose tissue lipolysis and blocked via Cubilin-** 202 **dependent endocytosis**

203 To define the physiological pathway leading from dietary high fat to nephrocyte lipid droplets,  
204 we directly tested the role of lipid overflow from the larval *Drosophila* adipose tissue (fat body)  
205 to peripheral tissues [43]. *Lpp-GAL4* was used to drive chronic expression of the adipocyte  
206 triglyceride lipase (ATGL) orthologue Brummer [44] in the fat body (*Lpp>ATGL*) (**Fig 1B**).  
207 As with HFD, fat-body specific ATGL expression in STD animals did not substantially alter  
208 growth, developmental timing or nephrocyte size (**S1D-S1F Fig**). Nevertheless, this genetic  
209 manipulation was sufficient to induce robust lipid droplet accumulation in nephrocytes of STD  
210 animals, suggesting that lipid overflow from adipose tissue may also be relevant for HFD-  
211 induced renal lipid droplets (**Fig 4A and 4B**). Lipid overflow from adipose tissue, like HFD,  
212 also lead to a functional deficit in nephrocyte endocytosis, as *Lpp>ATGL* animals also showed  
213 impaired dextran uptake (**Fig 4C and 4D**).

214  
215 In mammalian proximal tubule cells, the Cubilin (Cubn) receptor is known to be involved in  
216 the endocytic uptake of lipoproteins as well as proteins [45]. *Dot-GAL4* was therefore used to  
217 drive RNA interference (RNAi) for *Drosophila* Cubn specifically in nephrocytes  
218 (*Dot>Cubn[i]*). This revealed that, on HFD, *Cubn* is required for the accumulation of  
219 nephrocyte lipid droplets (**Fig 4E and 4F**). With the preceding results, this provides evidence  
220 supporting the conclusion that HFD leads to excess fat circulating in the hemolymph (blood),  
221 which is then endocytosed by nephrocytes via the Cubn receptor and targeted to lipid droplets.  
222 Given that Cubn knockdown did not significantly decrease nephrocyte uptake of a labelled free  
223 fatty acid (BODIPY FL C12), it is likely that lipoproteins are the major form of circulating fat  
224 that contributes to nephrocyte lipid droplets (**Fig 4G and 4H**).

225  
226 **Fig 4: Fat body lipolysis induces and Cubilin-dependent endocytosis blocks renal lipid**  
227 **droplets.**

228 (A-B) Confocal panels (A) and quantifications (B) show that lipid droplets (marked with  
229 LipidTOX) accumulate in nephrocytes (dashed outlines in A) of STD larvae expressing ATGL  
230 in the fat body (*Lpp>ATGL*) but not in controls (*Lpp>*).

231 (C-D) Confocal micrographs (C) and quantifications of dextran mean fluorescence intensity  
232 (D) show that *ex vivo* dextran uptake is decreased in nephrocytes of larvae expressing ATGL  
233 in the fat body (*Lpp>ATGL*) but not in those of control larvae (*Lpp>*). Similar results are  
234 obtained with 10kDa and 500kDa dextrans.

235 (E-F) Confocal micrographs (E) and quantifications (F) show that lipid droplets (marked with  
236 LipidTOX) are far less abundant in the nephrocytes (dashed outlines in E) of nephrocyte-  
237 specific Cubilin knockdown (*Dot>Cubn[i]*) compared to control (*Dot>*) HFD larvae.

238 (G-H) Confocal micrographs (G) and quantifications of fluorescence intensity (H) show that  
239 Cubilin knockdown in nephrocytes (*Dot>Cubn[i]*) does not decrease *ex vivo* uptake of a

## ATGL protects against renal dysfunction

240 fluorescent analogue of a C18 saturated free fatty acid (BODIPY FL C12) by nephrocytes from  
241 STD or HFD larvae. Panel G shows BODIPY FL C12 (green) and LipidTOX (magenta).  
242

### 243 **Boosting ATGL expression rescues HFD-induced nephrocyte dysfunction**

244 Our results show that excess circulating lipids are endocytosed by nephrocytes and targeted to  
245 lipid droplets. This raises an important question - what, if any, contribution do lipid droplets  
246 make towards HFD-induced renal dysfunction? To identify unambiguous functions for lipid  
247 droplets, rather than for fatty acid metabolism more generally, we targeted two enzymes with  
248 direct substrates/products corresponding to the triglyceride cargo of droplets, DGAT1/Midway  
249 and ATGL/Brummer. Importantly, nephrocyte lipid droplets in HFD animals were efficiently  
250 inhibited either by knocking down DGAT1 (*Dot>DGAT1[i]*) or by increasing the expression  
251 of ATGL (*Dot>ATGL*) (**Fig 5A**). Systematically comparing the HFD phenotypes of these two  
252 genetic manipulations allows the roles of lipid droplet triglycerides to be parsed into synthesis  
253 versus lipolysis functions. This comparative strategy revealed that DGAT1 knockdown in HFD  
254 nephrocytes gave a small decrease in mitochondrial volume, although it did not significantly  
255 decrease ER volume (**Fig 5B and 5C**). Blocking lipid droplets via ATGL expression, however,  
256 did significantly increase both mitochondrial and ER volumes in HFD nephrocytes, consistent  
257 with partial restoration of these cell parameters towards STD values (**Fig 5B and 5C**, compare  
258 with **Fig 1E**). Using the ratiometric dye BODIPY 581/591 C11 to detect lipid peroxidation, we  
259 observed no difference between STD and HFD nephrocytes (**S4 Fig**). Furthermore, lipid  
260 peroxidation on HFD did not significantly change with ATGL expression but it was strongly  
261 elevated with DGAT1 knockdown (**S4 Fig**). Together, these results demonstrate that abrogation  
262 of lipid droplets in HFD nephrocytes by increasing ATGL lipolysis is able to rescue  
263 significantly the mitochondrial and ER volumes without increasing lipid peroxidation. In  
264 contrast, blocking lipid droplet biogenesis in HFD nephrocytes via inactivation of DGAT1  
265 triglyceride synthesis fails to rescue mitochondria and ER and also increases potentially  
266 cytotoxic lipid peroxidation.

267  
268 We next assessed nephrocyte endocytic function. SBF SEM was used to analyse the entire cell  
269 volumes of STD, HFD, HFD DGAT1[i], and HFD ATGL nephrocytes (**S1 Movie to S4**  
270 **Movie**). Using our CLEM classification to segment these four nephrocyte volumes revealed  
271 that the HFD-associated decrease in the total number and volume of endosomes is fully rescued  
272 by ATGL but not by DGAT1[i] (**Fig 5D and 5E**). In line with this, both the dextran and albumin  
273 uptake of HFD nephrocytes were completely rescued by ATGL expression but not by DGAT1  
274 knockdown (**Fig 5F and 5G**). Importantly, DGAT1 knockdown was epistatic to ATGL



## ATGL protects against renal dysfunction

275 expression with respect to nephrocyte dextran uptake (**Fig 5H**). Hence, ATGL protects renal  
276 endocytic function via a mechanism requiring triglyceride substrates, rather than by any  
277 moonlighting activity of the enzyme. Together, these striking findings show that nephrocyte-  
278 specific ATGL expression is sufficient to ameliorate HFD-induced mitochondrial defects and  
279 to stimulate full rescue of endocytic function.

280

### 281 **Fig 5: ATGL rescues mitochondria and macromolecule uptake of HFD nephrocytes**

282 **(A)** Confocal micrographs of nephrocytes (dotted outlines), stained with a dye for neutral lipids  
283 (LipidTOX), and corresponding quantifications showing that LD accumulation observed on  
284 HFD in control larvae (*Dot>*) is almost completely blocked in nephrocyte-specific DGAT1  
285 RNAi (*Dot>DGAT1[i]*) or ATGL expression (*Dot>ATGL*) larvae. Scale bar = 50  $\mu$ m.

286 **(B-C)** Quantifications of nephrocyte ER volume (B) and mitochondrial volume (C) for HFD  
287 larvae of the control (*Dot>ctrl*), *Dot>DGAT1[i]* and *Dot>ATGL* genotypes.

288 **(D-E)** SBF SEM quantifications of total endosome numbers (D) and volumes (E) in STD  
289 control (*Dot>ctrl*), HFD control (*Dot>ctrl*), HFD *Dot>DGAT1[i]* and HFD *Dot>ATGL*  
290 nephrocytes.

291 **(F-G)** Quantifications of 10kDa and 500kDa dextran uptake (F) and albumin (FITC-BSA)  
292 uptake (G) in HFD nephrocytes showing that nephrocyte-specific ATGL expression  
293 (*Dot>ATGL*), but not DGAT1 knockdown (*Dot>DGAT1[i]*), rescues HFD nephrocyte  
294 endocytic function.

295 **(H)** Quantifications of nephrocyte uptake of 10kDa and 500kDa dextrans showing that the  
296 genetic rescue of HFD nephrocyte endocytic function obtained with nephrocyte-specific ATGL  
297 overexpression (*Dot>ATGL*) is blocked by concomitant DGAT1 knockdown  
298 (*Dot>DGAT1[i]*).

299

### 300 **ATGL rescue of HFD nephrocyte function requires Srl and Delg**

301 We reasoned that *UAS-ATGL* rescue of nephrocyte dysfunction may reflect restoration of HFD-  
302 induced downregulation of the endogenous *bmm/ATGL* gene. To test this possibility, a *bmm-*  
303 *GFP* transcriptional reporter (*ATGL-GFP*) was used to monitor *ATGL* gene expression [46].

304 This approach revealed that HFD leads to a significant decrease in *ATGL* expression (**Fig 6A**  
305 **and 6B**). Together with the ATGL rescue experiments, this suggests that transcriptional  
306 downregulation of ATGL could contribute to nephrocyte dysfunction on HFD. Interestingly,  
307 *ATGL-GFP* expression in HFD nephrocytes was restored to approximately STD levels by  
308 providing exogenous ATGL enzyme (*Dot>ATGL*), suggesting the existence of positive  
309 feedback between ATGL activity and *ATGL* transcription (**Fig 6C**). Thus, ATGL in  
310 nephrocytes regulates mitochondria as well as the transcription of its own gene, raising the  
311 question of whether these two ATGL functions are separate or linked. To address this, we  
312 manipulated peroxisome proliferator-activated receptor-gamma coactivator 1 $\alpha$  (PGC1 $\alpha$ ), a  
313 transcriptional coactivator that controls mitochondrial biogenesis and energy metabolism, also  
314 mediating proximal tubule recovery from kidney disease [47,48]. Spargel (Srl), the *Drosophila*

## ATGL protects against renal dysfunction

315 PGC1 $\alpha$  ortholog, regulates mitochondrial activity and it functions redundantly with the  
316 GABPA ortholog *Ets97D/Delg* to promote mitochondrial biogenesis [49,50]. Furthermore, *Srl*  
317 overexpression is known to counteract HFD-induced dysfunction of the *Drosophila* heart [51].  
318 Using nephrocyte-specific RNAi knockdowns, we found that *Srl* and *Delg* are each required  
319 for the normal mitochondrial volume of STD nephrocytes (**S5A Fig**). Importantly, knockdown  
320 of *PGC1 $\alpha$ /Srl* also decreased *ATGL-GFP* expression in STD nephrocytes (**Fig 6D**). This  
321 finding shows that a key transcriptional coactivator of mitochondrial genes, PGC1 $\alpha$ , is required  
322 directly or indirectly to regulate the expression of the *ATGL* gene.

323

324 To define the role of PGC1 $\alpha$ /*Srl* in HFD nephrocyte dysfunction, we used both  
325 pharmacological and genetic approaches. Pyrroloquinoline quinone (PQQ), an indirect  
326 activator of PGC1 $\alpha$ /*Srl* [52,53], was able to restore substantially the mitochondrial volume of  
327 control or *DGAT1[i]* HFD nephrocytes (**Fig 6E**). Strikingly, the degree of rescue of HFD  
328 mitochondrial volume with PQQ was comparable to that achieved via *ATGL* expression (**Fig**  
329 **6E**). The PQQ experiments rule out that PGC1 $\alpha$  solely acts upstream of *DGAT1*-dependent  
330 triglyceride biosynthesis and, together with the *GFP* reporter analysis, suggest that a HFD-  
331 induced decrease in PGC1 $\alpha$  expression/activity could downregulate *ATGL* gene expression.  
332 Importantly, genetic knockdown of *PGC1 $\alpha$ /Srl*, or *Delg*, inhibited *ATGL* rescue of HFD  
333 nephrocyte mitochondrial volume (**Fig 6F**). *Srl* knockdown also completely blocked *ATGL*  
334 rescue of nephrocyte dextran uptake, which remained at or slightly below the level that is  
335 observed in control genotype HFD animals (**Fig 6G and S5B Fig**). These pharmacological and  
336 genetic experiments together demonstrate that PGC1 $\alpha$  is required for the *ATGL* rescue of HFD-  
337 induced deficits in nephrocyte mitochondria and endocytosis.

338

339 **Fig 6: Rescue of nephrocyte mitochondria and endocytosis on HFD requires PGC1 $\alpha$ /*Srl*.**  
340 (A-D) Confocal micrographs of nephrocytes and quantifications showing that *ATGL-GFP*  
341 reporter expression is suppressed by HFD (A-B), restored by *Dot>ATGL* (C), and decreased by  
342 *Dot>Srl[i]* on STD diet (D). Note that the GFP intensities of HFD and STD nephrocytes can  
343 be directly compared in panel A because they are both imaged within the same field of view.  
344 (E) Dietary supplementation with pyrroloquinoline quinone (PQQ) rescues nephrocyte  
345 mitochondrial volume on HFD, in control or *Dot>DGAT1[i]* genotypes, back to a value similar  
346 to that in HFD *Dot>ATGL* or STD larvae.  
347 (F) *Dot>ATGL* rescue of nephrocyte mitochondrial volume is compromised by simultaneous  
348 knockdown of *PGC1 $\alpha$*  (*Dot>ATGL;Srl[i]*) or *Delg* (*Dot>ATGL;Delg[i]*).  
349 (G) *Dot>ATGL* rescue of 10 kDa and 500 kDa dextran uptake on HFD is blocked by  
350 simultaneous knockdown of *PGC1 $\alpha$*  (*Dot>ATGL;Srl[i]*).

351

352

## ATGL protects against renal dysfunction

### 353 Discussion

354 This study establishes the first *Drosophila* model for high-fat diet induced CKD. Our results  
355 reveal that exposure to HFD induces renal defects in *Drosophila* that are strikingly similar to  
356 those observed in mammals. Key metabolic features of CKD in podocytes and proximal tubule  
357 cells are recapitulated in *Drosophila* nephrocytes including lipid droplet induction, a decrease  
358 in mitochondrial volume, as well as compromised endocytic uptake of albumin and other  
359 macromolecules. The powerful genetics and high-throughput possibilities of the *Drosophila*  
360 model open up a significant new avenue for *in vivo* mechanistic studies of CKD. We now  
361 discuss the mechanism by which HFD induces CKD-like dysfunction in *Drosophila* and how  
362 increased ATGL/Bmm expression rescues it. We also discuss how side-by-side functional  
363 comparisons of the triglyceride metabolic enzymes DGAT1 and ATGL provide a widely  
364 applicable strategy for clarifying the cellular functions of stress-induced lipid droplets.

365

#### 366 **Boosting fatty acid flux through the triglyceride compartment protects renal endocytosis**

367 ATGL overexpression is predicted to increase the release of free fatty acids, a change that is  
368 associated with lipotoxicity. Nevertheless, we find that the outcome of this genetic  
369 manipulation can either be beneficial or harmful for renal endocytosis, depending upon whether  
370 it is adipose or nephrocyte specific. We showed that HFD induction of lipid droplets and  
371 endocytic dysfunction in nephrocytes are both mimicked on STD via overexpression of ATGL  
372 in adipose tissue. Furthermore, HFD induction of nephrocyte lipid droplets requires the Cubilin  
373 endocytic receptor. Together, these results suggest that excess diet-derived fatty acids are  
374 mobilised from adipose tissue into the circulation, taken up by nephrocytes via receptor-  
375 mediated endocytosis, and subsequently accumulate in the core of lipid droplets.

376

377 A key finding of this study is that experimentally boosting the expression of ATGL in  
378 nephrocytes rescues most of the deleterious effects of HFD on the morphology and function of  
379 these cells. Thus, ATGL expression substantially restored ER volume, mitochondrial volume,  
380 endosomal number and, importantly, the endocytosis of dextran and albumin. This striking  
381 protection of nephrocyte endocytic function by ATGL is strictly dependent upon DGAT1,  
382 strongly suggesting that it requires fatty acid flux into and out of the lipid droplet triglyceride  
383 compartment. Our analysis also suggests that fatty acid flux through the triglyceride  
384 compartment is suboptimal on HFD because ATGL becomes limiting. The observation that  
385 HFD decreases nephrocyte *ATGL* reporter expression is indicative of repression at the



## ATGL protects against renal dysfunction

386 transcriptional level. However, our results do not rule out an additional contribution to HFD  
387 repression of ATGL from post-transcriptional mechanisms.

388

### 389 **A general strategy for distinguishing between different lipid droplet functions**

390 Our systematic comparisons between two different genetic methods for inhibiting stress-  
391 induced lipid droplets have important implications for interpreting the role of these organelles  
392 in a wide range of different biological contexts. In the case of nephrocytes, we have shown that  
393 either blocking the last step of triglyceride synthesis (DGAT1 knockdown) or boosting lipolysis  
394 (ATGL overexpression) efficiently prevent the accumulation of lipid droplets, yet these  
395 manipulations produce different functional outcomes. We now outline how side-by-side  
396 comparisons of both genetic perturbations can be used to distinguish whether lipid droplets are  
397 harmful or protective and, if they are protective, to identify the underlying mechanism. DGAT1  
398 knockdown in HFD nephrocytes increases lipid peroxidation damage and decreases  
399 endocytosis. Hence, as for the hypoxic CNS [54], synthesis of the triglyceride core of the lipid  
400 droplet has a net protective effect on nephrocytes. To determine how the triglyceride core  
401 protects, it is then important to consider the functional effect of boosting lipolysis via ATGL.  
402 A harmful outcome implies that the protection offered by the lipid droplet triglyceride core  
403 involves sequestration of potentially toxic lipids [54], whereas a beneficial effect suggests that  
404 it corresponds to the release of protective lipids, with signalling or other roles [19,55,56]. In the  
405 case of HFD nephrocytes, we found that boosting ATGL rescues macromolecular uptake,  
406 suggesting that nephrocyte lipid droplets protect by acting as a source of beneficial lipids.  
407 Similar reasoning suggests a reinterpretation of two previous studies in the adult *Drosophila*  
408 retina, which reported that glial lipid droplets induced either by mitochondrial defects or by loss  
409 of ADAM17 metalloprotease act to promote neurodegeneration [57,58]. This conclusion was  
410 based on evidence that decreasing lipid droplets via the overexpression of Bmm/ATGL leads  
411 to less neurodegeneration. Our DGAT1 and ATGL comparisons now provide evidence that  
412 boosting ATGL equates to a gain not a loss of function for lipid droplets, or more precisely for  
413 their role as a platform for triglyceride lipolysis. Therefore, the previous retinal studies and our  
414 own nephrocyte findings are consistent in demonstrating a beneficial role for the lipolysis  
415 function of lipid droplets. This illustrates that caution is needed when assigning protective or  
416 harmful roles to lipid droplets and argues for a more nuanced interpretation that parses their  
417 various subfunctions.

418

### 419 **ATGL rescues renal endocytic dysfunction via the PGC1 $\alpha$ pathway**

## ATGL protects against renal dysfunction

420 This study reveals that ATGL/Bmm rescues HFD-induced dysfunction in *Drosophila* renal  
421 cells via a mechanism that requires GABPA/Delg and also PGC1 $\alpha$ /Srl, a conserved regulator  
422 of mitochondrial biogenesis, membrane potential and  $\beta$ -oxidation [47,48]. A pharmacological  
423 approach provided evidence that PGC1 $\alpha$  is sufficient to correct HFD deficits in nephrocyte  
424 mitochondrial volume. Unlike ATGL rescue, PGC1 $\alpha$  rescue does not require DGAT1-  
425 dependent triglyceride synthesis. Moreover, genetic epistasis tests demonstrated that PGC1 $\alpha$  is  
426 necessary for ATGL to rescue both the mitochondrial volume and the endocytic dysfunction of  
427 HFD nephrocytes. These findings together make it likely that triglyceride synthesis and ATGL-  
428 dependent lipolysis act upstream of the PGC1 $\alpha$ -dependent mitochondrial processes required  
429 for optimal nephrocyte endocytosis. Nevertheless, there is transgenic reporter evidence for the  
430 reverse regulatory relationship, namely that *PGC1 $\alpha$*  is required for *ATGL* expression. It is  
431 therefore probable that there is bidirectional positive regulation between ATGL and PGC1 $\alpha$ ,  
432 which is important for mitochondrial function and compromised by exposure to HFD. Reporter  
433 experiments also showed that boosting ATGL activity increases *ATGL* transcription, thus  
434 suggesting the existence of an ATGL positive feedback loop. Even though the complete  
435 molecular pathways accounting for how increased ATGL expression in HFD nephrocytes  
436 rescues PGC1 $\alpha$  mitochondrial processes are not yet known, it is plausible that ATGL activates  
437 transcription factors cooperating with the PGC1 $\alpha$  coactivator. For example, it has been reported  
438 that mammalian ATGL releases lipolytic products that can activate the nuclear receptor  
439 PPAR $\alpha$ , a partner of PGC1 $\alpha$ , either directly or via the Sirtuin 1 deacetylase [59,60]. Another  
440 non-mutually exclusive possibility is that ATGL could rescue HFD nephrocytes via channelling  
441 fatty acids from lipid droplets into mitochondria for  $\beta$ -oxidation, as has been suggested in  
442 cultured cells subject to nutrient deprivation or fatty acid toxicity [55,61]. In the context of  
443 CKD, it is known that  $\beta$ -oxidation is downregulated and the pharmacological reversal of this  
444 has been proposed as a potential treatment [62]. Our findings now raise the possibility that  
445 pharmacological activators of lipid droplet lipolysis could be a useful addition to existing  
446 treatments for CKD. For example, small-molecule ligands for a potent activator of ATGL can  
447 boost lipolysis in adipose and muscle tissue and it has been argued that they might be developed  
448 into therapeutic entities for obesity and diabetes [63]. In the context of CKD, our nephrocyte  
449 study suggests that it will be important to test whether this approach has the ability to induce  
450 enough beneficial lipolysis in renal cells to deal with the concomitant increase in lipid overflow  
451 from adipose tissue. If this is the case, then therapies boosting lipid droplet lipolysis could  
452 provide a novel strategy for targeting obesity-associated CKD as well as its comorbidities.

## ATGL protects against renal dysfunction

### 453 **Materials and Methods**

#### 454 ***Drosophila* strains**

455 Control *Drosophila* strains used in this study, including controls for Gal4/UAS experiments,  
456 were a *Wolbachia*-negative derivative of the  $w^{1118} iso^{31}$  strain [64] and/or *UAS-mCherry RNAi*  
457 ( $y^1 sc^* v^1 sev^{21}; P\{y[+t7.7] v[+t1.8]=VALIUM20-mCherry\}attP2$ ). Nephrocyte and fat-body  
458 specific manipulations were performed using *Dot-GAL4* [65] and *Lpp-GAL4* [66] respectively.  
459 The following UAS fly stocks were used in this study and previously validated in the associated  
460 references: *UAS-Cubn[i]* ( $w^{1118}; P\{GD6458\}v14613$ ) [67], *UAS-mdy[i]* ( $P\{KK102899\}VIE-$   
461  $260B$ ) [54], *UAS-bmm* [44], *Rab7::YFPmyc* [39], *UAS-LDAH::eGFP* (*UAS-CG9186::eGFP*)  
462 [37], and *UAS-Delg[i]* ( $y^1 v^1; P\{y[+t7.7] v[+t1.8]=TRiP.JF01805\}attP2$ ). Similar results were  
463 obtained using *UAS-Srl[i]* ( $P\{KK100201\}VIE-260B$ ) [53] or *UAS-Srl[i]* ( $y^1 sc^* v^1 sev^{21};$   
464  $P\{y[+t7.7] v[+t1.8]=TRiP.HMS00858\}attP2$ ) [68].

465

#### 466 **Standard and high fat diet, larval staging and PQQ treatment**

467 All stocks were raised on our standard diet (STD) at 25°C unless otherwise stated. STD contains  
468 58.5 g/L glucose, 6.63 g/L cornmeal, 23.4 g/L dried yeast, 7.02 g/L agar, 1.95 g/L Nipagen and  
469 7.8 mg/L Bavistan, unless specified otherwise. Flies were left to lay eggs for 2 hr, on plates  
470 containing grape juice agar with yeast paste in the centre. After egg maturation for 24 hr,  
471 hatched L1 larvae were collected from the agar plates during a 1 hr time window using blunt  
472 forceps, 20-25 individuals transferred to each vial at 25°C with the appropriate diet and raised  
473 to wandering L3 stage (~90 hr after larval hatching) for nephrocyte analysis. High fat diet  
474 (HFD) corresponds to STD supplemented with 20 mM oleic acid. Pyrroloquinoline quinone  
475 (PQQ) as added to the diet at 0.3 mM.

476

#### 477 **Immunostaining and confocal microscopy**

478 Larvae were inverted and fixed in 4% PFA in PBS for 30 minutes at 25°C. After fixation,  
479 samples were washed three times in PBS and dissected further, if necessary. Samples were  
480 blocked in 10% normal goat serum (NGS) in PBS + 0.2% Triton (PBT), incubated overnight at  
481 4°C with primary antibodies diluted in 10% NGS in PBT, washed three times in PBT over 1  
482 hr, incubated overnight at 4°C with secondary antibodies diluted in 10% NGS in PBT, and then  
483 washed three times in PBT over 1 hr. Primary antibodies used were chicken anti-GFP at 1:1000  
484 (Abcam, ab13970), rat anti-KDEL 10C3 at 1:300 (Abcam, ab12223) and mouse anti-ATP5A  
485 15H4C4 at 1:100 (Abcam, ab14748), the secondary antibodies were Alexa Fluor conjugated  
486 antibodies (ThermoFisher Scientific) used at concentration 1:500. For neutral lipid staining,

## ATGL protects against renal dysfunction

487 larvae were inverted in PBS and fixed overnight at 4°C in 2% PFA in PBL (75mM lysine,  
488 37mM sodium phosphate buffer at pH7.4). Pericardial nephrocytes were dissected further in  
489 PBS, permeabilized for 4 min in 0.1% PBT, washed 3 times for 10 min in PBS, and stained  
490 with LipidTox Deep Red o/n at 4°C. All samples were mounted in Vectashield. For volume  
491 measurements, samples were mounted in a well generated by 1 layer of magic tape (Scotch) to  
492 avoid compression. All samples were imaged on a Leica SP5 upright microscope using oil  
493 immersion objectives. Samples for direct quantitative comparison were imaged on the same  
494 day using the same settings. For volume measurements, confocal Z stacks spanning the entire  
495 depth of the tissue were acquired (step size of 1  $\mu$ m) and analyses were carried out using  
496 Volocity v6 (Quorum Technologies).

497

### 498 ***ex vivo* nephrocyte uptake assays**

499 Dextran uptake assays were performed as described [31] with some modifications. Wandering  
500 L3 larvae were inverted in Schneider's Insect Medium, excess tissue was removed and larval  
501 carcasses with CNS and pericardial nephrocytes attached were incubated for 30 min at 25°C in  
502 Schneider's Medium with 10 kDa AlexaFluor568-dextran and 500 kDa FITC-dextran at a  
503 concentration of 0.33 mg/ml. For albumin uptake assay, pericardial nephrocytes were incubated  
504 for 30 min at 25°C in Schneider's Medium (S0146, Merck) with FITC-albumin and Red DQ-  
505 albumin at a concentration of 0.1 mg/ml. Next, tissues were washed with ice-cold PBS and  
506 fixed with 4% formaldehyde for 20 min at RT. If neutral lipid staining was required, tissues  
507 were permeabilised with 0.1% PBT for 5 min at RT, washed extensively with PBS and stained  
508 with LipidTox 633 o/n at 4°C. For BODIPY FL C12 (Thermo Fisher Scientific, D3822) uptake  
509 assays, pericardial nephrocytes were incubated for 30 min at 25°C in Schneider's Medium with  
510 0.5 mg/ml delipidated BSA (A9205, Merck) and 10  $\mu$ M BODIPY FL C12 green fluorescent  
511 fatty acid. Tissues were then washed with ice-cold PBS and fixed with 4% formaldehyde for  
512 20 min at 25°C. Stained tissues were mounted in Vectashield on glass slides with a coverslip  
513 spacer of one layer of Scotch tape, and imaged on a Leica SP5 as described above.

514

### 515 **Lipid peroxidation assay**

516 To detect lipid peroxidation in nephrocytes, nephrocytes were dissected in Schneider's medium  
517 and incubated for 30 min in Schneider's medium containing 10% NGS and 2  $\mu$ M BODIPY  
518 581/591 C11 (Invitrogen, D3861). Samples were washed and mounted in Schneider's medium,  
519 then control and experimental samples were imaged sequentially for the non-oxidized  
520 (excitation: 561 nm, emission: 570-610 nm) and oxidized (excitation: 488 nm, emission: 500-

## ATGL protects against renal dysfunction

521 540 nm) forms. The oxidized: non-oxidized ratio was measured in each nephrocyte and  
522 intensity modulated ratiometric images were generated using Volocity v6 (Quorum  
523 Technologies).

524

### 525 **Electron microscopy**

526 For correlative light-electron microscopy (CLEM), dextran uptake assays were performed on  
527 dorsal vessel-pericardial nephrocyte complexes from STD and HFD larvae as described above.  
528 After washing in cold PBS, tissues were fixed with 4% paraformaldehyde in phosphate buffer  
529 (PB) for 1hr and flat mounted in 1.5% low-melting-temperature agarose in PB on glass  
530 coverslips. Rab7::YFP<sup>myc</sup> expressing nephrocytes were imaged on a Zeiss LSM880 Airyscan  
531 confocal microscope using a 63x 1.4 NA oil immersion objective. Z stacks were obtained at 0.5  
532  $\mu\text{m}$  step size using Auto Z Brightness Correction. Airyscan processing was performed using  
533 default settings in the ZEN software. Samples were then removed from the glass slide, excess  
534 agarose trimmed off and postfixed with 2% paraformaldehyde and 2.5% glutaraldehyde for 1hr,  
535 prior to serial block face scanning electron microscopy (SBF SEM).

536 For SBF SEM, nephrocytes dissected from *Dot>DGAT1[i]* and *Dot>ATGL* larvae were first  
537 subjected to dextran uptake assays and representative cells then selected for SBF SEM analysis.  
538 Nephrocytes were then fixed with 2% or 4% paraformaldehyde and 2.5% glutaraldehyde in PB  
539 for 1h, washed in PB, and flat mounted in 1.5% low-melting-temperature agarose in PB on  
540 glass coverslips. All samples, including those for CLEM, were processed for SBF SEM using  
541 the previously described protocol with modifications [69]. Briefly, tissues were post-fixed in  
542 2% osmium tetroxide and 1.5% potassium ferricyanide for 1hr, incubated in 1%  
543 thiocarbohydrazide for 20 min, followed by 2% osmium tetroxide for 30 min. Osmicated tissues  
544 were then stained *en bloc* with 1% uranyl acetate overnight, followed by Walton's lead aspartate  
545 staining for 30 min at 40–60°C. Tissues were then dehydrated with a graded ethanol series, flat-  
546 embedded in Durcupan ACM® resin, and polymerized at 60°C. Samples were mounted onto  
547 aluminum pins using conductive epoxy glue (ITW Chemtronics) and trimmed to the region of  
548 interest guided by light microscopy images. Trimmed blocks were sputter-coated with 5–10 nm  
549 platinum using a Q150R S sputter coater (Quorum Tech). SBF SEM data was collected using  
550 a 3View2XP (Gatan, Pleasanton, CA) attached to a Sigma VP SEM (Zeiss, Cambridge). The  
551 microscope was operated at 2.0-2.3kV with 30- $\mu\text{m}$  aperture, using Variable Pressure mode or  
552 Focal Charge Compensation mode [70]. Inverted backscattered electron images were acquired  
553 through entire nephrocytes every 50 or 100 nm, at a resolution of 6.5–8.0 nm/pixel. Acquired  
554 images were imported into Fiji [71] and aligned using the Register Virtual Stack Slices [72].



## ATGL protects against renal dysfunction

555 For the Movies S1–S4, aligned data were scaled down to 50 nm/pixel and encoded into the H.  
556 264 compression format using the ImageJ plugin [imagej-ffmpeg-recorder](#).

557

### 558 **SBF SEM quantification of endosomes**

559 CLEM was used to define the morphology of the endocytic compartments to be quantified using  
560 SBF SEM. The Airyscan Z-stack was matched to the SBF SEM data using the Fiji plugin  
561 [BigWarp](#). Endolysosomes were manually selected in each stack as landmarks, and thin-plate  
562 spline transformation was applied to match the two stacks. ~70 endolysosomes were classified  
563 using CLEM into five morphology groups based on their SEM luminal density and their  
564 Dextran and Rab7::YFP<sup>myc</sup> status in the corresponding Airyscan images (**S3A Fig**). Dark  
565 endolysosomes with a luminal density similar to or higher than the cytoplasm were all Dextran<sup>-</sup>  
566 (but Rab7<sup>+</sup> and Rab7<sup>-</sup>) and therefore, along with Golgi apparatus associated vesicles, were not  
567 segmented in SBF SEM images. White and light endosomes were segmented on one or more  
568 SBF SEM slices including the midplane of the compartment by fitting the largest inscribed  
569 circle using the Fiji plugin TrakEM2 [73]. Then using the Fiji 3D Object Counter [74], the size  
570 of the bounding box was used to estimate the object diameter and this was used to calculate the  
571 spherical volume. For quantitation of endosome numbers and volumes, a size threshold of 300  
572 nm diameter was selected and validated by showing that it gave comparable endosome size  
573 distributions for the different fixation protocols used for CLEM or for standard SBF SEM (**S3B**  
574 **Fig**).

575

### 576 **Statistical Analysis**

577 R version 3.5.1 (2018-07-02) was used for all statistical analysis (R Core Team, 2018). Boxplots  
578 were generated using [ggplot2](#), show the median with first and third quartile, and whiskers  
579 extend from the hinge by 1.5x inter-quartile range. Data points are coloured according to which  
580 independent experiment they are from. For statistical analyses, the data was modelled using a  
581 linear mixed model (LMM) with diet as fixed and independent experiment as random effect  
582 followed by a Wald Chi-Squared test. Asterisks show statistical significance (\* p<0.05, \*\*  
583 p<0.005, \*\*\*p<0.0005). The data were modelled using restricted maximum likelihood (REML)  
584 linear mixed models (LMM) or general linear mixed models (GLMM) from the lme4 package  
585 [75]. The model fit was evaluated using normal quantile-quantile plots. Experimental  
586 manipulation such as diet, genetic manipulation and dextran size were categorized as fixed  
587 effects, and independent experiments were categorized as random effects. Statistical inference  
588 for fixed effects was tested by Wald Chi-Square test from the R car package [76]. For multiple

## ATGL protects against renal dysfunction

589 comparisons, estimated marginal means (EMM) were predicted using the R emmeans package  
590 [77] and comparisons used Bonferroni correction. Statistical methods, parameters and results  
591 for each figure are summarized in **Table S1**.  
592

## ATGL protects against renal dysfunction

### 593 **Acknowledgements**

594 We acknowledge Mathias Beller, R. Kühnlein, and the late Susan Abmayr and Suzanne Eaton  
595 for fly stocks and antibodies. Fly stocks were also obtained from the Bloomington *Drosophila*  
596 Stock Center (NIH P40OD018537), the Vienna *Drosophila* Research Centre and the Kyoto  
597 *Drosophila* Genetic Resource. We thank Andrew Bailey, Clare Newell and Ian McGough for  
598 assistance with experiments as well as for helpful advice and discussions. We also thank Eva  
599 Islimye and Elisabeth Kamper for comments on the manuscript.

600 This work was supported by an Investigator Award to APG from the Wellcome Trust  
601 (104566/Z/14/Z) and by funding to APG from the Francis Crick Institute, which receives its  
602 core funding from Cancer Research UK (FC001088), the UK Medical Research Council  
603 (FC001088) and the Wellcome Trust (FC001088).



## ATGL protects against renal dysfunction

### 604 **References**

605

606

607 1. Alicic RZ, Rooney MT, Tuttle KR. Diabetic Kidney Disease: Challenges, Progress,  
608 and Possibilities. *Clin J Am Soc Nephrol.* 2017;12(12):2032-45. Epub 2017/05/20. doi:  
609 10.2215/CJN.11491116. PubMed PMID: 28522654; PubMed Central PMCID:  
610 PMCPMC5718284.

611 2. Anders HJ, Huber TB, Isermann B, Schiffer M. CKD in diabetes: diabetic kidney  
612 disease versus nondiabetic kidney disease. *Nat Rev Nephrol.* 2018;14(6):361-77. Epub  
613 2018/04/15. doi: 10.1038/s41581-018-0001-y. PubMed PMID: 29654297.

614 3. Carobbio S, Pellegrinelli V, Vidal-Puig A. Adipose Tissue Function and  
615 Expandability as Determinants of Lipotoxicity and the Metabolic Syndrome. *Adv Exp Med*  
616 *Biol.* 2017;960:161-96. Epub 2017/06/07. doi: 10.1007/978-3-319-48382-5\_7. PubMed  
617 PMID: 28585199.

618 4. Escasany E, Izquierdo-Lahuerta A, Medina-Gomez G. Underlying Mechanisms of  
619 Renal Lipotoxicity in Obesity. *Nephron.* 2019;143(1):28-32. Epub 2019/01/10. doi:  
620 10.1159/000494694. PubMed PMID: 30625473.

621 5. Moorhead JF, Chan MK, El-Nahas M, Varghese Z. Lipid nephrotoxicity in chronic  
622 progressive glomerular and tubulo-interstitial disease. *Lancet.* 1982;2(8311):1309-11. Epub  
623 1982/12/11. doi: 10.1016/s0140-6736(82)91513-6. PubMed PMID: 6128601.

624 6. Krahmer N, Farese RV, Jr., Walther TC. Balancing the fat: lipid droplets and human  
625 disease. *EMBO Mol Med.* 2013;5(7):973-83. Epub 2013/06/07. doi:  
626 10.1002/emmm.201100671. PubMed PMID: 23740690; PubMed Central PMCID:  
627 PMCPMC3721468.

628 7. Briffa JF, McAinch AJ, Poronnik P, Hryciw DH. Adipokines as a link between  
629 obesity and chronic kidney disease. *Am J Physiol Renal Physiol.* 2013;305(12):F1629-36.  
630 Epub 2013/10/11. doi: 10.1152/ajprenal.00263.2013. PubMed PMID: 24107418.

631 8. Zhu Q, Scherer PE. Immunologic and endocrine functions of adipose tissue:  
632 implications for kidney disease. *Nat Rev Nephrol.* 2018;14(2):105-20. Epub 2017/12/05. doi:  
633 10.1038/nrneph.2017.157. PubMed PMID: 29199276.

634 9. D'Agati VD, Chagnac A, de Vries AP, Levi M, Porrini E, Herman-Edelstein M, et al.  
635 Obesity-related glomerulopathy: clinical and pathologic characteristics and pathogenesis. *Nat*  
636 *Rev Nephrol.* 2016;12(8):453-71. Epub 2016/06/07. doi: 10.1038/nrneph.2016.75. PubMed  
637 PMID: 27263398.

638 10. Jiang T, Wang Z, Proctor G, Moskowitz S, Liebman SE, Rogers T, et al. Diet-induced  
639 obesity in C57BL/6J mice causes increased renal lipid accumulation and glomerulosclerosis  
640 via a sterol regulatory element-binding protein-1c-dependent pathway. *J Biol Chem.*  
641 2005;280(37):32317-25. Epub 2005/07/28. doi: 10.1074/jbc.M500801200. PubMed PMID:  
642 16046411.

## ATGL protects against renal dysfunction

- 643 11. Li C, Lin Y, Luo R, Chen S, Wang F, Zheng P, et al. Intrarenal renin-angiotensin  
644 system mediates fatty acid-induced ER stress in the kidney. *Am J Physiol Renal Physiol*.  
645 2016;310(5):F351-63. Epub 2015/12/18. doi: 10.1152/ajprenal.00223.2015. PubMed PMID:  
646 26672616; PubMed Central PMCID: PMC4971807.
- 647 12. Kuwahara S, Hosojima M, Kaneko R, Aoki H, Nakano D, Sasagawa T, et al. Megalin-  
648 Mediated Tubuloglomerular Alterations in High-Fat Diet-Induced Kidney Disease. *J Am Soc*  
649 *Nephrol*. 2016;27(7):1996-2008. Epub 2015/11/05. doi: 10.1681/ASN.2015020190. PubMed  
650 PMID: 26534923; PubMed Central PMCID: PMC4926965.
- 651 13. Szeto HH, Liu S, Soong Y, Alam N, Prusky GT, Seshan SV. Protection of  
652 mitochondria prevents high-fat diet-induced glomerulopathy and proximal tubular injury.  
653 *Kidney Int*. 2016;90(5):997-1011. Epub 2016/08/16. doi: 10.1016/j.kint.2016.06.013.  
654 PubMed PMID: 27519664.
- 655 14. Forbes JM, Thorburn DR. Mitochondrial dysfunction in diabetic kidney disease. *Nat*  
656 *Rev Nephrol*. 2018;14.
- 657 15. Welte MA, Gould AP. Lipid droplet functions beyond energy storage. *Biochim*  
658 *Biophys Acta Mol Cell Biol Lipids*. 2017;1862(10 Pt B):1260-72. Epub 2017/07/25. doi:  
659 10.1016/j.bbalip.2017.07.006. PubMed PMID: 28735096; PubMed Central PMCID:  
660 PMC5595650.
- 661 16. Olzmann JA, Carvalho P. Dynamics and functions of lipid droplets. *Nat Rev Mol Cell*  
662 *Biol*. 2019;20(3):137-55. Epub 2018/12/14. doi: 10.1038/s41580-018-0085-z. PubMed PMID:  
663 30523332; PubMed Central PMCID: PMC6746329.
- 664 17. Walther TC, Chung J, Farese RV, Jr. Lipid Droplet Biogenesis. *Annu Rev Cell Dev*  
665 *Biol*. 2017;33:491-510. Epub 2017/08/11. doi: 10.1146/annurev-cellbio-100616-060608.  
666 PubMed PMID: 28793795.
- 667 18. Henne WM, Reese ML, Goodman JM. The assembly of lipid droplets and their roles  
668 in challenged cells. *EMBO J*. 2018;37(12). Epub 2018/05/24. doi: 10.15252/embj.201898947.  
669 PubMed PMID: 29789390; PubMed Central PMCID: PMC6003646.
- 670 19. Zechner R, Zimmermann R, Eichmann TO, Kohlwein SD, Haemmerle G, Lass A, et  
671 al. FAT SIGNALS--lipases and lipolysis in lipid metabolism and signaling. *Cell Metab*.  
672 2012;15(3):279-91. Epub 2012/03/13. doi: 10.1016/j.cmet.2011.12.018. PubMed PMID:  
673 22405066; PubMed Central PMCID: PMC3314979.
- 674 20. Schulze RJ, Sathyanarayan A, Mashek DG. Breaking fat: The regulation and  
675 mechanisms of lipophagy. *Biochim Biophys Acta Mol Cell Biol Lipids*. 2017;1862(10 Pt  
676 B):1178-87. Epub 2017/06/24. doi: 10.1016/j.bbalip.2017.06.008. PubMed PMID: 28642194;  
677 PubMed Central PMCID: PMC5595645.
- 678 21. Kimmelstiel P, Wilson C. Intercapillary Lesions in the Glomeruli of the Kidney. *Am J*  
679 *Pathol*. 1936;12(1):83-98. Epub 1936/01/01. PubMed PMID: 19970254; PubMed Central  
680 PMCID: PMC1911022.
- 681 22. Herman-Edelstein M, Scherzer P, Tobar A, Levi M, Gafter U. Altered renal lipid  
682 metabolism and renal lipid accumulation in human diabetic nephropathy. *J Lipid Res*.  
683 2014;55(3):561-72. Epub 2013/12/29. doi: 10.1194/jlr.P040501. PubMed PMID: 24371263;  
684 PubMed Central PMCID: PMC3934740.

## ATGL protects against renal dysfunction

- 685 23. Chen W, Zhang Q, Cheng S, Huang J, Diao G, Han J. Atgl gene deletion predisposes  
686 to proximal tubule damage by impairing the fatty acid metabolism. *Biochem Biophys Res*  
687 *Commun.* 2017;487(1):160-6. Epub 2017/04/13. doi: 10.1016/j.bbrc.2017.03.170. PubMed  
688 PMID: 28400046.
- 689 24. Chen W, Jiang Y, Han J, Hu J, He T, Yan T, et al. Atgl deficiency induces podocyte  
690 apoptosis and leads to glomerular filtration barrier damage. *FEBS J.* 2017;284(7):1070-81.  
691 Epub 2017/02/15. doi: 10.1111/febs.14038. PubMed PMID: 28194887.
- 692 25. Ugur B, Chen K, Bellen HJ. Drosophila tools and assays for the study of human  
693 diseases. *Dis Model Mech.* 2016;9(3):235-44. Epub 2016/03/05. doi: 10.1242/dmm.023762.  
694 PubMed PMID: 26935102; PubMed Central PMCID: PMC4833332.
- 695 26. Denholm B, Skaer H. Bringing together components of the fly renal system. *Curr*  
696 *Opin Genet Dev.* 2009;19(5):526-32. Epub 2009/09/29. doi: 10.1016/j.gde.2009.08.006.  
697 PubMed PMID: 19783135; PubMed Central PMCID: PMC2789252.
- 698 27. Dow JA, Romero MF. Drosophila provides rapid modeling of renal development,  
699 function, and disease. *Am J Physiol Renal Physiol.* 2010;299(6):F1237-44. Epub 2010/10/12.  
700 doi: 10.1152/ajprenal.00521.2010. PubMed PMID: 20926630; PubMed Central PMCID:  
701 PMC3006309.
- 702 28. Na J, Cagan R. The Drosophila nephrocyte: back on stage. *J Am Soc Nephrol.*  
703 2013;24(2):161-3. Epub 2013/01/22. doi: 10.1681/ASN.2012121227. PubMed PMID:  
704 23334393.
- 705 29. O'Donnell MJ, Maddrell SH. Fluid reabsorption and ion transport by the lower  
706 Malpighian tubules of adult female Drosophila. *J Exp Biol.* 1995;198(Pt 8):1647-53. Epub  
707 1995/08/01. PubMed PMID: 7636442.
- 708 30. Cabrero P, Terhzaz S, Dornan AJ, Ghimire S, Holmes HL, Turin DR, et al.  
709 Specialized stellate cells offer a privileged route for rapid water flux in Drosophila renal  
710 tubule. *Proc Natl Acad Sci U S A.* 2020;117(3):1779-87. Epub 2020/01/08. doi:  
711 10.1073/pnas.1915943117. PubMed PMID: 31907321; PubMed Central PMCID:  
712 PMC6983416.
- 713 31. Weavers H, Prieto-Sanchez S, Grawe F, Garcia-Lopez A, Artero R, Wilsch-  
714 Brauning M, et al. The insect nephrocyte is a podocyte-like cell with a filtration slit  
715 diaphragm. *Nature.* 2009;457(7227):322-6. Epub 2008/10/31. doi: 10.1038/nature07526.  
716 PubMed PMID: 18971929; PubMed Central PMCID: PMC2687078.
- 717 32. Zhuang S, Shao H, Guo F, Trimble R, Pearce E, Abmayr SM. Sns and Kirre, the  
718 Drosophila orthologs of Neph1 and Neph3, direct adhesion, fusion and formation of a slit  
719 diaphragm-like structure in insect nephrocytes. *Development.* 2009;136(14):2335-44. Epub  
720 2009/06/12. doi: 10.1242/dev.031609. PubMed PMID: 19515699; PubMed Central PMCID:  
721 PMC2729346.
- 722 33. Zhang F, Zhao Y, Chao Y, Muir K, Han Z. Cubilin and amnionless mediate protein  
723 reabsorption in Drosophila nephrocytes. *J Am Soc Nephrol.* 2013;24(2):209-16. Epub  
724 2012/12/25. doi: 10.1681/ASN.2012080795. PubMed PMID: 23264686; PubMed Central  
725 PMCID: PMC3559489.

## ATGL protects against renal dysfunction

- 726 34. Hermle T, Braun DA, Helmstadter M, Huber TB, Hildebrandt F. Modeling  
727 Monogenic Human Nephrotic Syndrome in the *Drosophila* Garland Cell Nephrocyte. *J Am*  
728 *Soc Nephrol.* 2017;28(5):1521-33. Epub 2016/12/10. doi: 10.1681/ASN.2016050517.  
729 PubMed PMID: 27932481; PubMed Central PMCID: PMC5407722.
- 730 35. Marchesin V, Perez-Marti A, Le Meur G, Pichler R, Grand K, Klootwijk ED, et al.  
731 Molecular Basis for Autosomal-Dominant Renal Fanconi Syndrome Caused by HNF4A. *Cell*  
732 *Rep.* 2019;29(13):4407-21 e5. Epub 2019/12/26. doi: 10.1016/j.celrep.2019.11.066. PubMed  
733 PMID: 31875549; PubMed Central PMCID: PMC6941224.
- 734 36. Na J, Sweetwyne MT, Park AS, Susztak K, Cagan RL. Diet-Induced Podocyte  
735 Dysfunction in *Drosophila* and Mammals. *Cell Rep.* 2015;12(4):636-47. Epub 2015/07/21.  
736 doi: 10.1016/j.celrep.2015.06.056. PubMed PMID: 26190114; PubMed Central PMCID:  
737 PMC532696.
- 738 37. Thiel K, Heier C, Haberl V, Thul PJ, Oberer M, Lass A, et al. The evolutionarily  
739 conserved protein CG9186 is associated with lipid droplets, required for their positioning and  
740 for fat storage. *J Cell Sci.* 2013;126(Pt 10):2198-212. Epub 2013/03/26. doi:  
741 10.1242/jcs.120493. PubMed PMID: 23525007; PubMed Central PMCID:  
742 PMC3880856.
- 743 38. Kawasaki Y, Matsumoto A, Miyaki T, Kinoshita M, Kakuta S, Sakai T, et al. Three-  
744 dimensional architecture of pericardial nephrocytes in *Drosophila melanogaster* revealed by  
745 FIB/SEM tomography. *Cell Tissue Res.* 2019;378(2):289-300. Epub 2019/05/16. doi:  
746 10.1007/s00441-019-03037-3. PubMed PMID: 31089884.
- 747 39. Dunst S, Kazimiers T, von Zadow F, Jambor H, Sagner A, Brankatschk B, et al.  
748 Endogenously tagged rab proteins: a resource to study membrane trafficking in *Drosophila*.  
749 *Dev Cell.* 2015;33(3):351-65. Epub 2015/05/06. doi: 10.1016/j.devcel.2015.03.022. PubMed  
750 PMID: 25942626; PubMed Central PMCID: PMC4431667.
- 751 40. Kosaka T, Ikeda K. Reversible blockage of membrane retrieval and endocytosis in the  
752 garland cell of the temperature-sensitive mutant of *Drosophila melanogaster*, shibirets1. *J Cell*  
753 *Biol.* 1983;97(2):499-507. Epub 1983/08/01. doi: 10.1083/jcb.97.2.499. PubMed PMID:  
754 6411734; PubMed Central PMCID: PMC2112522.
- 755 41. Koenig JH, Ikeda K. Transformational process of the endosomal compartment in  
756 nephrocytes of *Drosophila melanogaster*. *Cell Tissue Res.* 1990;262(2):233-44. Epub  
757 1990/11/01. doi: 10.1007/BF00309878. PubMed PMID: 2127554.
- 758 42. Lorincz P, Lakatos Z, Varga A, Maruzs T, Simon-Vecsei Z, Darula Z, et al.  
759 MiniCORVET is a Vps8-containing early endosomal tether in *Drosophila*. *Elife.* 2016;5.  
760 Epub 2016/06/03. doi: 10.7554/eLife.14226. PubMed PMID: 27253064; PubMed Central  
761 PMCID: PMC4935465.
- 762 43. Gutierrez E, Wiggins D, Fielding B, Gould AP. Specialized hepatocyte-like cells  
763 regulate *Drosophila* lipid metabolism. *Nature.* 2007;445(7125):275-80. Epub 2006/12/01. doi:  
764 10.1038/nature05382. PubMed PMID: 17136098.
- 765 44. Gronke S, Mildner A, Fellert S, Tennagels N, Petry S, Muller G, et al. Brummer lipase  
766 is an evolutionary conserved fat storage regulator in *Drosophila*. *Cell Metab.* 2005;1(5):323-  
767 30. Epub 2005/08/02. doi: 10.1016/j.cmet.2005.04.003. PubMed PMID: 16054079.

## ATGL protects against renal dysfunction

- 768 45. Eshbach ML, Weisz OA. Receptor-Mediated Endocytosis in the Proximal Tubule.  
769 *Annu Rev Physiol.* 2017;79:425-48. Epub 2016/11/05. doi: 10.1146/annurev-physiol-022516-  
770 034234. PubMed PMID: 27813828; PubMed Central PMCID: PMC5512543.
- 771 46. Men TT, Thanh DN, Yamaguchi M, Suzuki T, Hattori G, Arii M, et al. A *Drosophila*  
772 Model for Screening Antiobesity Agents. *Biomed Res Int.* 2016;2016:6293163. Epub  
773 2016/06/02. doi: 10.1155/2016/6293163. PubMed PMID: 27247940; PubMed Central  
774 PMCID: PMC54876200.
- 775 47. Spiegelman BM. Transcriptional control of mitochondrial energy metabolism through  
776 the PGC1 coactivators. *Novartis Found Symp.* 2007;287:60-3; discussion 3-9. Epub  
777 2007/12/14. PubMed PMID: 18074631.
- 778 48. Bhargava P, Schnellmann RG. Mitochondrial energetics in the kidney. *Nat Rev*  
779 *Nephrol.* 2017;13(10):629-46. Epub 2017/08/15. doi: 10.1038/nrneph.2017.107. PubMed  
780 PMID: 28804120; PubMed Central PMCID: PMC5965678.
- 781 49. Tiefenböck SK, Baltzer C, Egli NA, Frei C. The *Drosophila* PGC-1 homologue  
782 Spargel coordinates mitochondrial activity to insulin signalling. *EMBO J.* 2010;29(1):171-83.  
783 Epub 2009/11/17. doi: 10.1038/emboj.2009.330. PubMed PMID: 19910925; PubMed Central  
784 PMCID: PMC2808377.
- 785 50. Baltzer C, Tiefenböck SK, Marti M, Frei C. Nutrition Controls Mitochondrial  
786 Biogenesis in the *Drosophila* Adipose Tissue through Delg and Cyclin D/Cdk4. *PLoS ONE.*  
787 2009;4(9). doi: 10.1371/journal.pone.0006935.
- 788 51. Diop SB, Bisharat-Kernizan J, Birse RT, Oldham S, Ocorr K, Bodmer R. PGC-  
789 1/Spargel Counteracts High-Fat-Diet-Induced Obesity and Cardiac Lipotoxicity Downstream  
790 of TOR and Brummer ATGL Lipase. *Cell Rep.* 2015;10(9):1572-84. Epub 2015/03/11. doi:  
791 10.1016/j.celrep.2015.02.022. PubMed PMID: 25753422; PubMed Central PMCID:  
792 PMC4560688.
- 793 52. Saihara K, Kamikubo R, Ikemoto K, Uchida K, Akagawa M. Pyrroloquinoline  
794 Quinone, a Redox-Active o-Quinone, Stimulates Mitochondrial Biogenesis by Activating the  
795 SIRT1/PGC-1 $\alpha$  Signaling Pathway. *Biochemistry.* 2017;56(50):6615-25. Epub  
796 2017/12/01. doi: 10.1021/acs.biochem.7b01185. PubMed PMID: 29185343.
- 797 53. Ng CH, Basil AH, Hang L, Tan R, Goh KL, O'Neill S, et al. Genetic or  
798 pharmacological activation of the *Drosophila* PGC-1 $\alpha$  ortholog spargel rescues the  
799 disease phenotypes of genetic models of Parkinson's disease. *Neurobiol Aging.* 2017;55:33-7.  
800 Epub 2017/04/14. doi: 10.1016/j.neurobiolaging.2017.03.017. PubMed PMID: 28407521.
- 801 54. Bailey AP, Koster G, Guillemier C, Hirst EM, MacRae JI, Lechene CP, et al.  
802 Antioxidant Role for Lipid Droplets in a Stem Cell Niche of *Drosophila*. *Cell.*  
803 2015;163(2):340-53. Epub 2015/10/10. doi: 10.1016/j.cell.2015.09.020. PubMed PMID:  
804 26451484; PubMed Central PMCID: PMC4601084.
- 805 55. Nguyen TB, Louie SM, Daniele JR, Tran Q, Dillin A, Zoncu R, et al. DGAT1-  
806 Dependent Lipid Droplet Biogenesis Protects Mitochondrial Function during Starvation-  
807 Induced Autophagy. *Dev Cell.* 2017;42(1):9-21 e5. Epub 2017/07/12. doi:  
808 10.1016/j.devcel.2017.06.003. PubMed PMID: 28697336; PubMed Central PMCID:  
809 PMC5553613.



## ATGL protects against renal dysfunction

- 810 56. Khan SA, Sathyanarayan A, Mashek MT, Ong KT, Wollaston-Hayden EE, Mashek  
811 DG. ATGL-catalyzed lipolysis regulates SIRT1 to control PGC-1 $\alpha$ /PPAR- $\alpha$   
812 signaling. *Diabetes*. 2015;64(2):418-26. Epub 2015/01/24. doi: 10.2337/db14-0325. PubMed  
813 PMID: 25614670; PubMed Central PMCID: PMC4303962.
- 814 57. Liu L, Zhang K, Sandoval H, Yamamoto S, Jaiswal M, Sanz E, et al. Glial Lipid  
815 Droplets and ROS Induced by Mitochondrial Defects Promote Neurodegeneration. *Cell*.  
816 2015;160(1-2):177-90. doi: 10.1016/j.cell.2014.12.019.
- 817 58. Muliylil S, Levet C, Düsterhöft S, Dulloo I, Cowley S, Freeman M. ADAM17-  
818 triggered TNF signalling protects the ageing *Drosophila* retina from lipid droplet mediated  
819 degeneration. *bioRxiv*. 2020:2020.01.09.900209. doi: 10.1101/2020.01.09.900209.
- 820 59. Haemmerle G, Moustafa T, Woelkart G, Buttner S, Schmidt A, van de Weijer T, et al.  
821 ATGL-mediated fat catabolism regulates cardiac mitochondrial function via PPAR- $\alpha$  and  
822 PGC-1. *Nat Med*. 2011;17(9):1076-85. Epub 2011/08/23. doi: 10.1038/nm.2439. PubMed  
823 PMID: 21857651; PubMed Central PMCID: PMC3244833.
- 824 60. Najt CP, Khan SA, Heden TD, Witthuhn BA, Perez M, Heier JL, et al. Lipid Droplet-  
825 Derived Monounsaturated Fatty Acids Traffic via PLIN5 to Allosterically Activate SIRT1.  
826 *Mol Cell*. 2020;77(4):810-24 e8. Epub 2020/01/07. doi: 10.1016/j.molcel.2019.12.003.  
827 PubMed PMID: 31901447.
- 828 61. Rambold AS, Cohen S, Lippincott-Schwartz J. Fatty acid trafficking in starved cells:  
829 regulation by lipid droplet lipolysis, autophagy, and mitochondrial fusion dynamics. *Dev Cell*.  
830 2015;32(6):678-92. Epub 2015/03/11. doi: 10.1016/j.devcel.2015.01.029. PubMed PMID:  
831 25752962; PubMed Central PMCID: PMC4375018.
- 832 62. Kang HM, Ahn SH, Choi P, Ko YA, Han SH, Chinga F, et al. Defective fatty acid  
833 oxidation in renal tubular epithelial cells has a key role in kidney fibrosis development. *Nat*  
834 *Med*. 2015;21(1):37-46. Epub 2014/11/25. doi: 10.1038/nm.3762. PubMed PMID: 25419705;  
835 PubMed Central PMCID: PMC4444078.
- 836 63. Sanders MA, Madoux F, Mladenovic L, Zhang H, Ye X, Angrish M, et al.  
837 Endogenous and Synthetic ABHD5 Ligands Regulate ABHD5-Perilipin Interactions and  
838 Lipolysis in Fat and Muscle. *Cell Metab*. 2015;22(5):851-60. Epub 2015/09/29. doi:  
839 10.1016/j.cmet.2015.08.023. PubMed PMID: 26411340; PubMed Central PMCID:  
840 PMC4862007.
- 841 64. Stefana MI, Driscoll PC, Obata F, Pengelly AR, Newell CL, MacRae JI, et al.  
842 Developmental diet regulates *Drosophila* lifespan via lipid autotoxins. *Nat Commun*.  
843 2017;8(1):1384. Epub 2017/11/11. doi: 10.1038/s41467-017-01740-9. PubMed PMID:  
844 29123106; PubMed Central PMCID: PMC5680271.
- 845 65. Kimbrell DA, Hice C, Bolduc C, Kleinhesselink K, Beckingham K. The Dorothy  
846 enhancer has Tinman binding sites and drives hopscotch-induced tumor formation. *Genesis*.  
847 2002;34(1-2):23-8. Epub 2002/09/27. doi: 10.1002/gene.10134. PubMed PMID: 12324942.
- 848 66. Brankatschk M, Eaton S. Lipoprotein particles cross the blood-brain barrier in  
849 *Drosophila*. *J Neurosci*. 2010;30(31):10441-7. Epub 2010/08/06. doi:  
850 10.1523/JNEUROSCI.5943-09.2010. PubMed PMID: 20685986.

## ATGL protects against renal dysfunction

- 851 67. Zhang F, Zhao Y, Han Z. An in vivo functional analysis system for renal gene  
852 discovery in *Drosophila* pericardial nephrocytes. *J Am Soc Nephrol*. 2013;24(2):191-7. Epub  
853 2013/01/08. doi: 10.1681/ASN.2012080769. PubMed PMID: 23291470; PubMed Central  
854 PMCID: PMC3559487.
- 855 68. Merzetti EM, Staveley BE. spargel, the PGC-1alpha homologue, in models of  
856 Parkinson disease in *Drosophila melanogaster*. *BMC Neurosci*. 2015;16:70. Epub 2015/10/28.  
857 doi: 10.1186/s12868-015-0210-2. PubMed PMID: 26502946; PubMed Central PMCID:  
858 PMC4623274.
- 859 69. Russell MR, Lerner TR, Burden JJ, Nkwe DO, Pelchen-Matthews A, Domart MC, et  
860 al. 3D correlative light and electron microscopy of cultured cells using serial blockface  
861 scanning electron microscopy. *J Cell Sci*. 2017;130(1):278-91. Epub 2016/07/23. doi:  
862 10.1242/jcs.188433. PubMed PMID: 27445312; PubMed Central PMCID:  
863 PMC5394779.
- 864 70. Deerinck TJ, Shone TM, Bushong EA, Ramachandra R, Peltier ST, Ellisman MH.  
865 High-performance serial block-face SEM of nonconductive biological samples enabled by  
866 focal gas injection-based charge compensation. *J Microsc*. 2018;270(2):142-9. Epub  
867 2017/12/02. doi: 10.1111/jmi.12667. PubMed PMID: 29194648; PubMed Central PMCID:  
868 PMC5910240.
- 869 71. Schindelin J, Arganda-Carreras I, Frise E, Kaynig V, Longair M, Pietzsch T, et al.  
870 Fiji: an open-source platform for biological-image analysis. *Nat Methods*. 2012;9(7):676-82.  
871 Epub 2012/06/30. doi: 10.1038/nmeth.2019. PubMed PMID: 22743772; PubMed Central  
872 PMCID: PMC3855844.
- 873 72. Arganda-Carreras I, Sorzano COS, Marabini R, Carazo JM, Ortiz-de Solorzano C,  
874 Kybic J. Elastic Registration of Histological Sections using Vector-Spline Regularization. In:  
875 Beichel RD, Sonka M, editors. *Computer Vision Approaches to Medical Image Analysis*.  
876 Berlin, Heidelberg: Springer; 2006. p. 85-95.
- 877 73. Cardona A, Saalfeld S, Schindelin J, Arganda-Carreras I, Preibisch S, Longair M, et  
878 al. TrakEM2 software for neural circuit reconstruction. *PLoS One*. 2012;7(6):e38011. Epub  
879 2012/06/23. doi: 10.1371/journal.pone.0038011. PubMed PMID: 22723842; PubMed Central  
880 PMCID: PMC3378562.
- 881 74. Bolte S, Cordelieres FP. A guided tour into subcellular colocalization analysis in light  
882 microscopy. *J Microsc*. 2006;224(Pt 3):213-32. Epub 2007/01/11. doi: 10.1111/j.1365-  
883 2818.2006.01706.x. PubMed PMID: 17210054.
- 884 75. Bates D, Mächler M, Bolker B, Walker S. Fitting Linear Mixed-Effects Models Using  
885 lme4. *Journal of Statistical Software*. 2015;67:1-48. doi: 10.18637/jss.v067.i01.
- 886 76. Fox J, Weisberg S. *An R Companion to Applied Regression*. Third ed. Thousand Oaks  
887 CA: Sage; 2019.
- 888 77. Searle SR, Speed FM, Milliken GA. Population Marginal Means in the Linear Model:  
889 An Alternative to Least Squares Means. *The American Statistician*. 1980;34(4):216-21. doi:  
890 10.1080/00031305.1980.10483031.  
891  
892

## ATGL protects against renal dysfunction

### 893 Supporting Figure Legends

#### 894 **Figure S1. HFD and genetic lipid overflow models do not disrupt growth and** 895 **developmental timing.**

896 (A-C) Graphs compare STD and HFD animals, indicating that they have similar larval weight  
897 (mg), nephrocyte volume ( $\mu\text{m}^3$ ) and developmental timing (% pupariation versus hours after  
898 larval hatching).

899 (D-F) Graphs compare STD animals expressing ATGL in the fat body (*Lpp>ATGL*) with  
900 controls (*Lpp-GAL4*). indicating that they have similar larval weight (mg), nephrocyte volume  
901 ( $\mu\text{m}^3$ ) and developmental timing (% pupariation versus hours after larval hatching). Note that  
902 nephrocyte size is significantly different ( $p < 0.0005$ ) between control and ATGL expressing  
903 animals.

904

#### 905 **Figure S2. Time course of dextran uptake in nephrocytes.**

906 (A-B) Graphs quantify individual uptake (A) and uptake ratio (B) of fluorescently labelled  
907 500 kDa and 10 kDa dextrans as a function of time (min) for *ex vivo* pericardial nephrocytes.

908

#### 909 **Figure S3. CLEM analysis of endolysosomes in STD nephrocytes.**

910 (A) The five endolysosomal categories distinguished in correlative light-electron microscopy  
911 (CLEM) analysis of *Rab7::YFP<sup>myc</sup>* STD nephrocytes subjected to dextran uptake assays. The  
912 criteria used were scanning EM luminal density ("white", "light" or "dark"), and also the "+"  
913 or "-" status of expression of Dextran and *Rab7::GFP*. Scale bar = 1  $\mu\text{m}$ .

914 (B) Quantitations from SBF SEM volumes of a STD control and a STD *Rab7::YFP<sup>myc</sup>*  
915 nephrocyte showing similar endosome size distributions. Note that "white" and "light"  
916 endosomes but not "dark" endolysosomes were segmented and quantified per cell according  
917 to their diameter ( $\mu\text{m}$ ).

918

#### 919 **Figure S4. DGAT1 knockdown increases nephrocyte lipid peroxidation.**

920 (A) Confocal panels represent ratio of oxidized (500-540 nm emission) to non-oxidized (570-  
921 610 nm emission) forms of the lipid peroxidation sensor BODIPY 581/591 C11 in pericardial  
922 nephrocytes (dotted outlines) from STD larvae and HFD larvae carrying *Dot>DGAT1[i]* or  
923 *Dot>ATGL*.

924 (B) Graph quantifies oxidized: non-oxidized ratios of the lipid peroxidation sensor BODIPY  
925 581/591 C11 in pericardial nephrocytes for the dietary and genetic manipulations in A. On  
926 HFD, lipid peroxidation is increased by *DGAT1* knockdown but not by *ATGL* expression.

927

#### 928 **Figure S5. *Srl* knockdown prevents ATGL rescue of dextran uptake.**

929 (A) *Delg* or *Srl* knockdown decreases mitochondrial volume in STD nephrocytes.  
930 Quantitation of mitochondrial volumes (as % of cell volume) of STD pericardial nephrocytes  
931 for control (*Dot>*), *Dot>Delg[i]* and *Dot>Srl[i]* larvae.

932 (B) Confocal panels show 10 kDa and 500 kDa dextran uptake in *ex vivo* pericardial  
933 nephrocytes of control (*Dot>*) and *Dot>ATGL; Srl[i]* larvae on HFD. The dextran signals of  
934 both genotypes, imaged within the same field of view, are comparable. Graph shows small  
935 but significant *decrease* in 10 kDa and 500 kDa dextran uptake between control (*Dot>*) and  
936 *Dot>ATGL; Srl[i]* larvae on HFD. Note that in the absence of *Srl* knockdown, ATGL  
937 significantly *increases* dextran uptake on HFD.

938

939 **Movie S1. SBF SEM Z stack of a STD nephrocyte.** Data were collected with a 0.1  $\mu\text{m}$  step  
940 size and recorded at 25 fps.

941



## ATGL protects against renal dysfunction

942 **Movie S2. SBF SEM Z stack of a HFD nephrocyte.** Data were collected with a 0.1  $\mu\text{m}$  step  
943 size and recorded at 25 fps.

944

945 **Movie S3. SBF SEM Z stack of a *Dot>DGAT1*/ij HFD nephrocyte.** Data were collected with  
946 a 0.1  $\mu\text{m}$  step size and recorded at 25 fps.

947

948 **Movie S4. SBF SEM Z stack of a *Dot>ATGL* HFD nephrocyte.** Data were collected with a  
949 0.1  $\mu\text{m}$  step size and recorded at 25 fps.

950

951 **Table S1. Summary of statistical methods and analysis.** For each main and supporting figure,  
952 the linear mixed models, statistical inference tests and p values are shown.

Figure 1

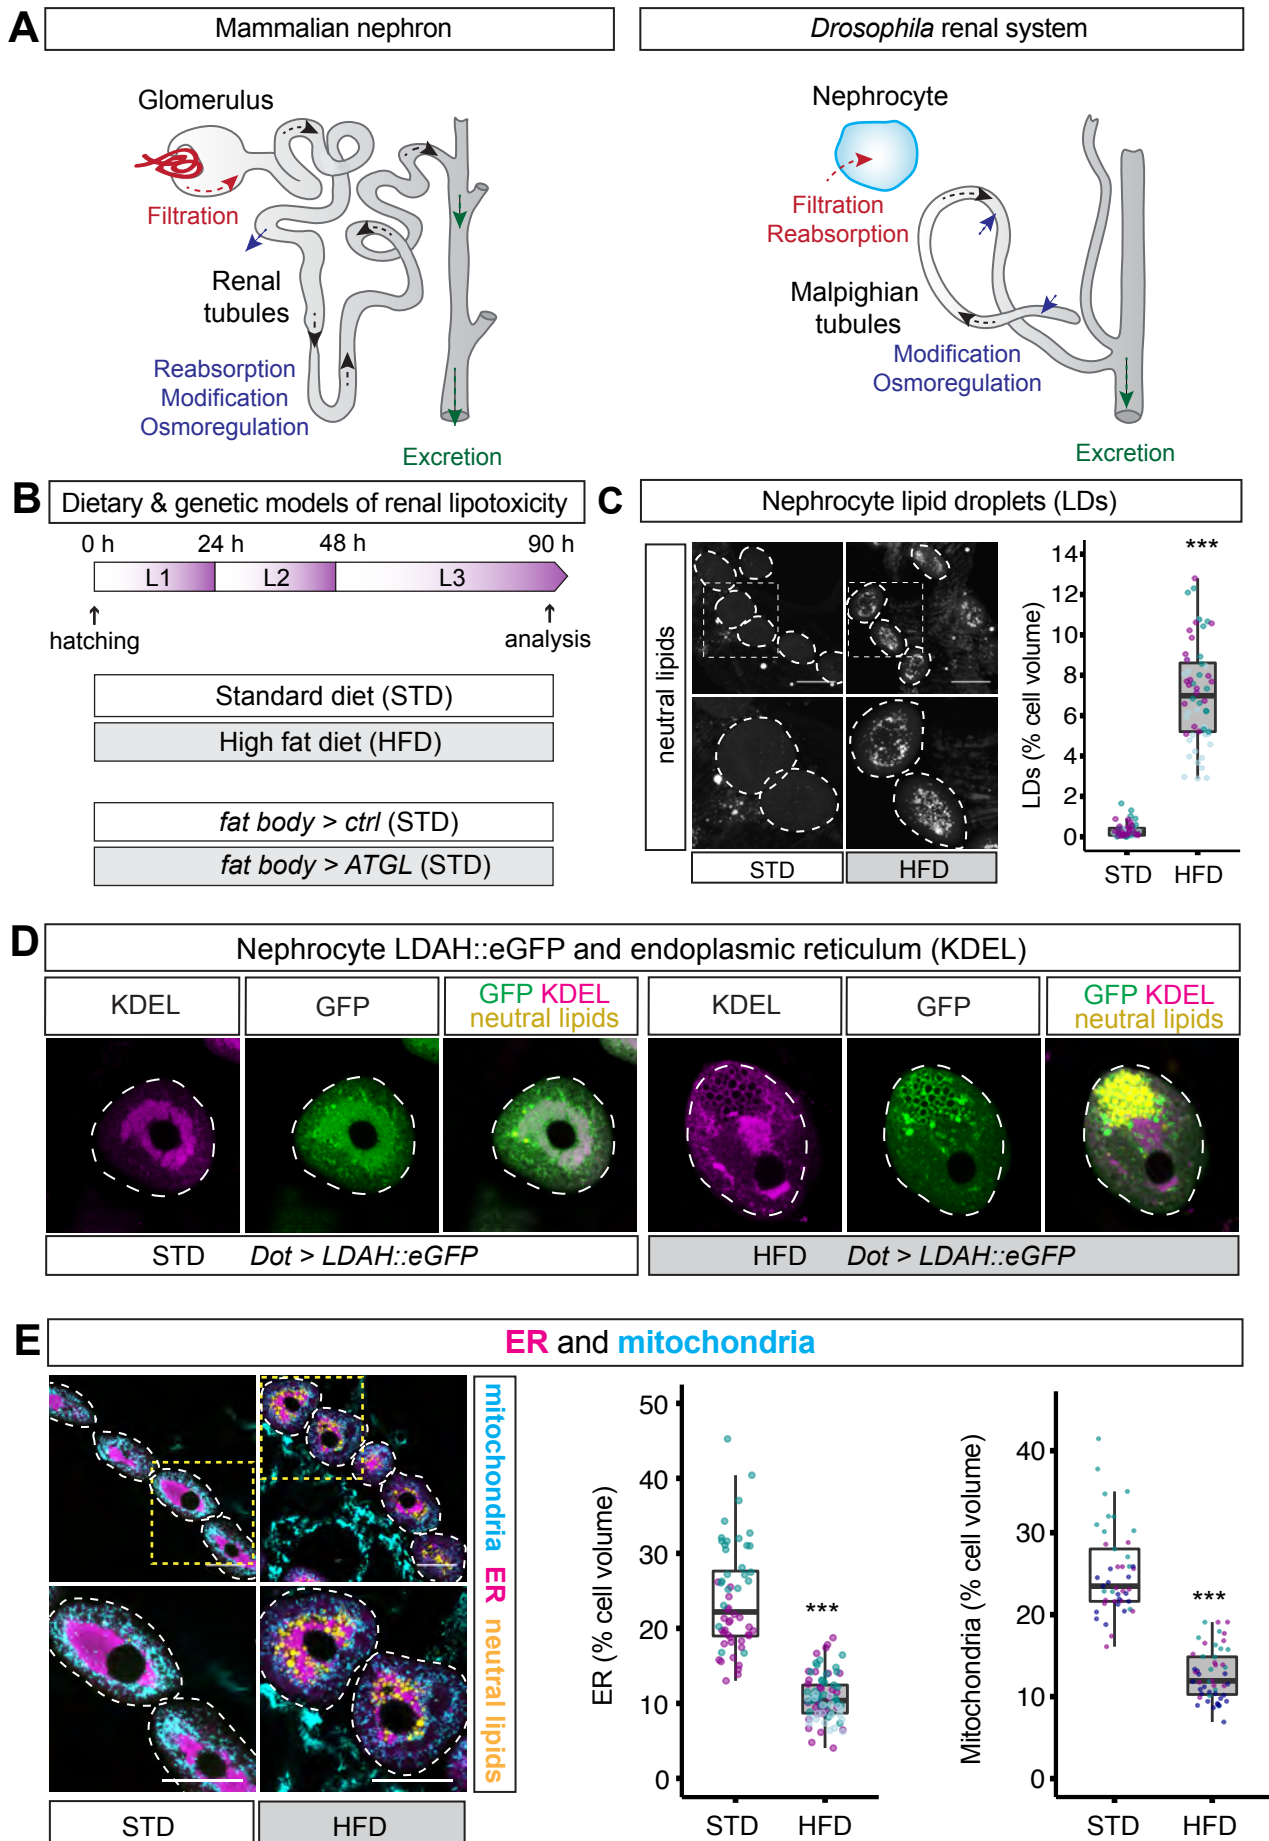

## Figure 2

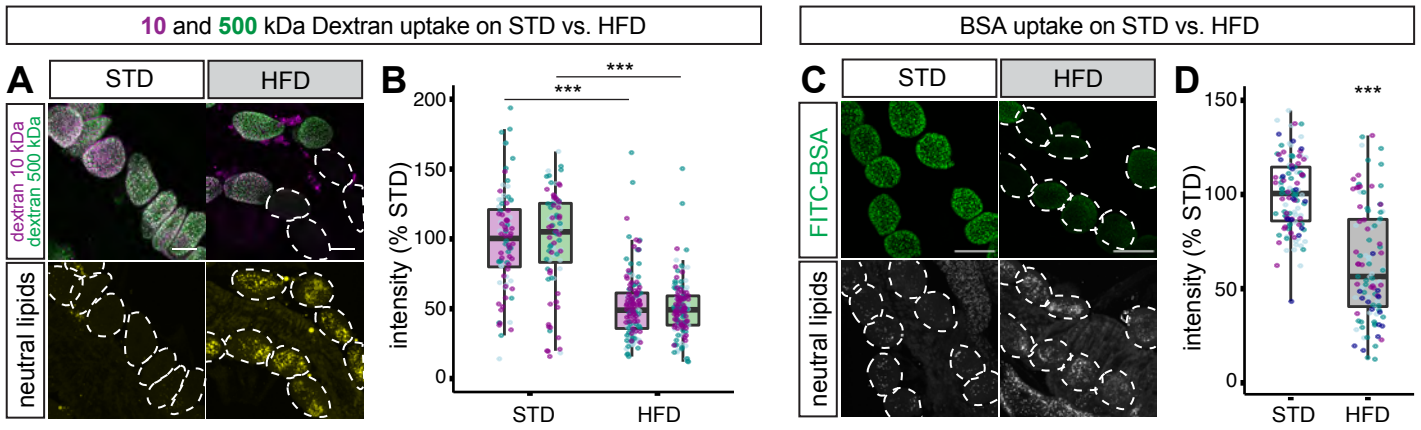

### Figure 3

**A**

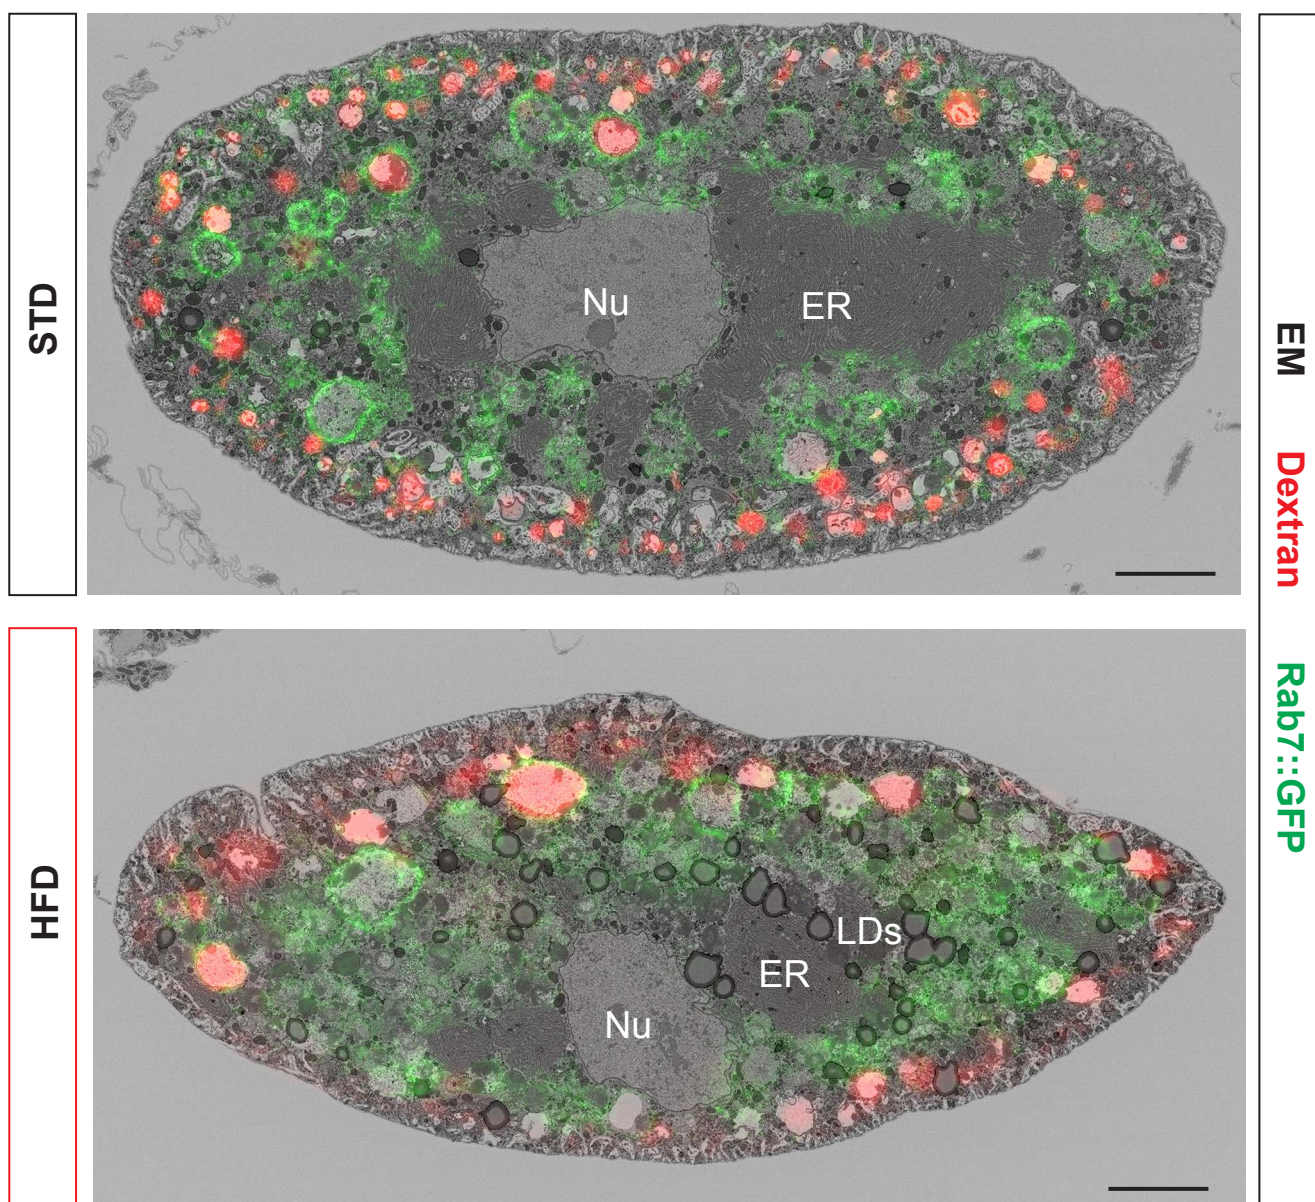

**B**

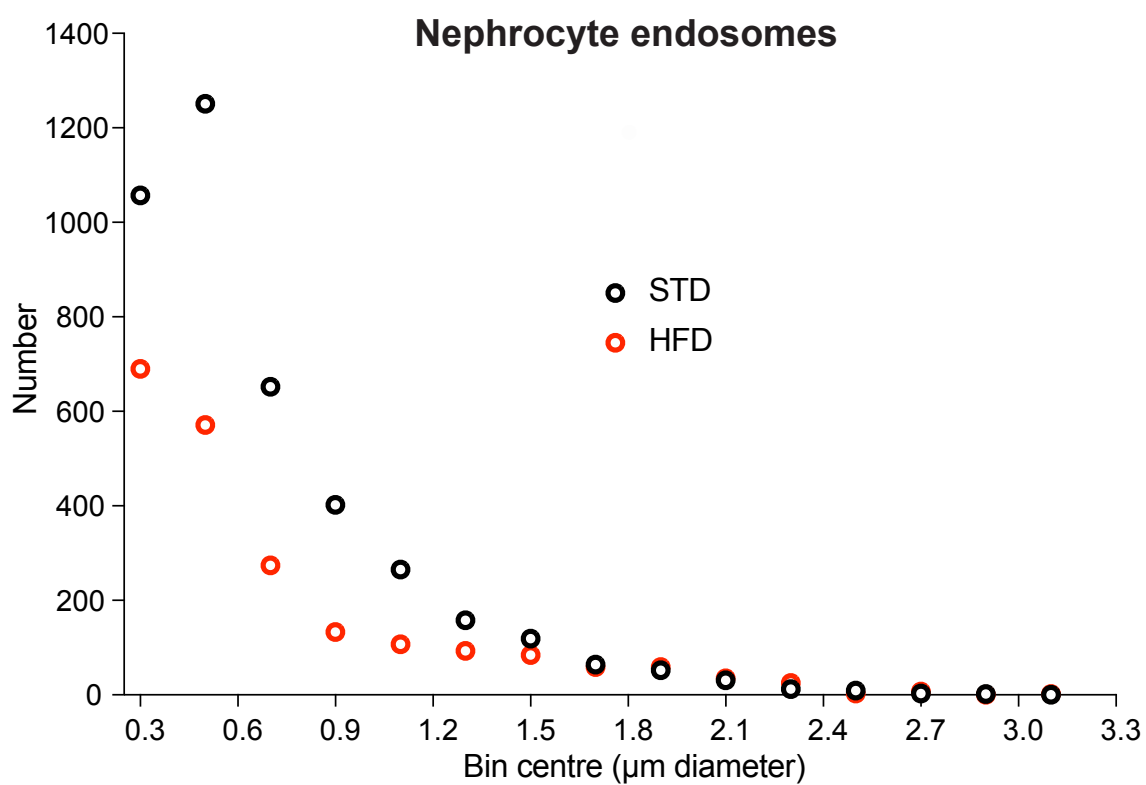



## Figure 4

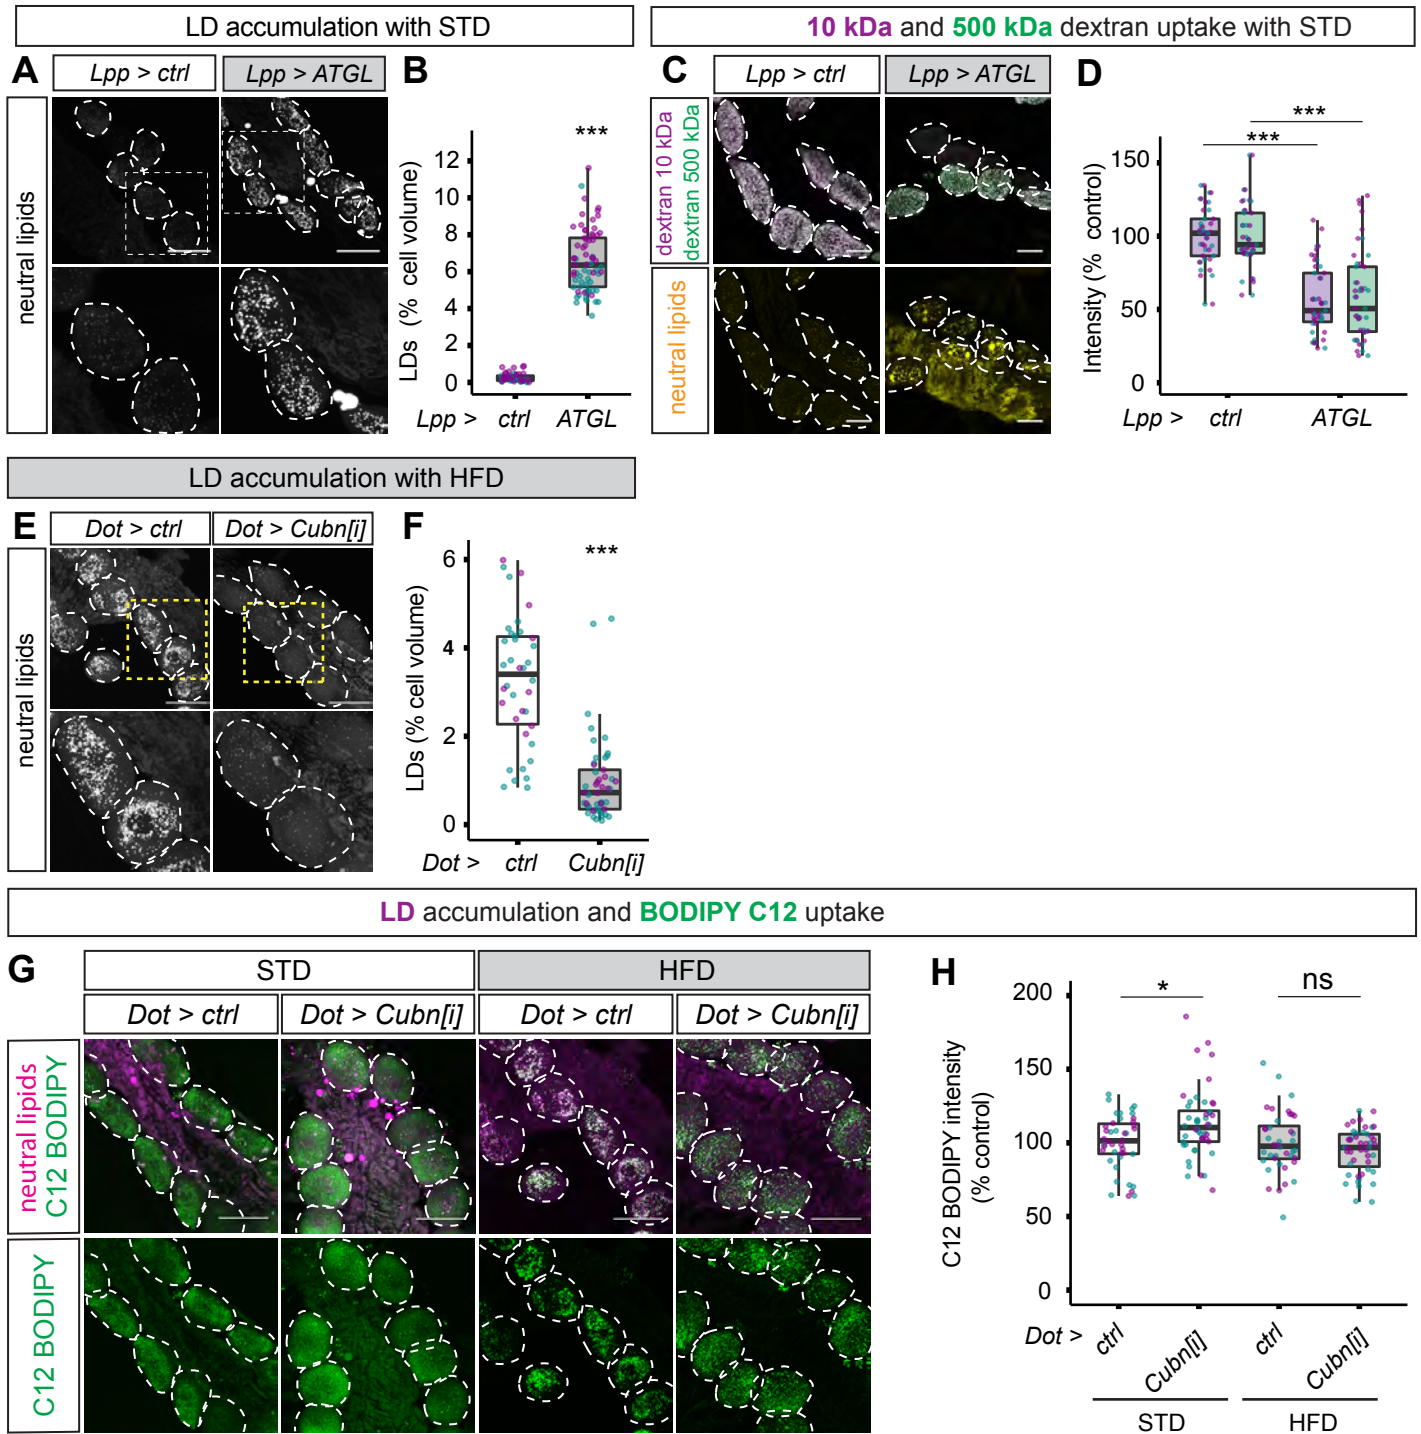

## Figure 5

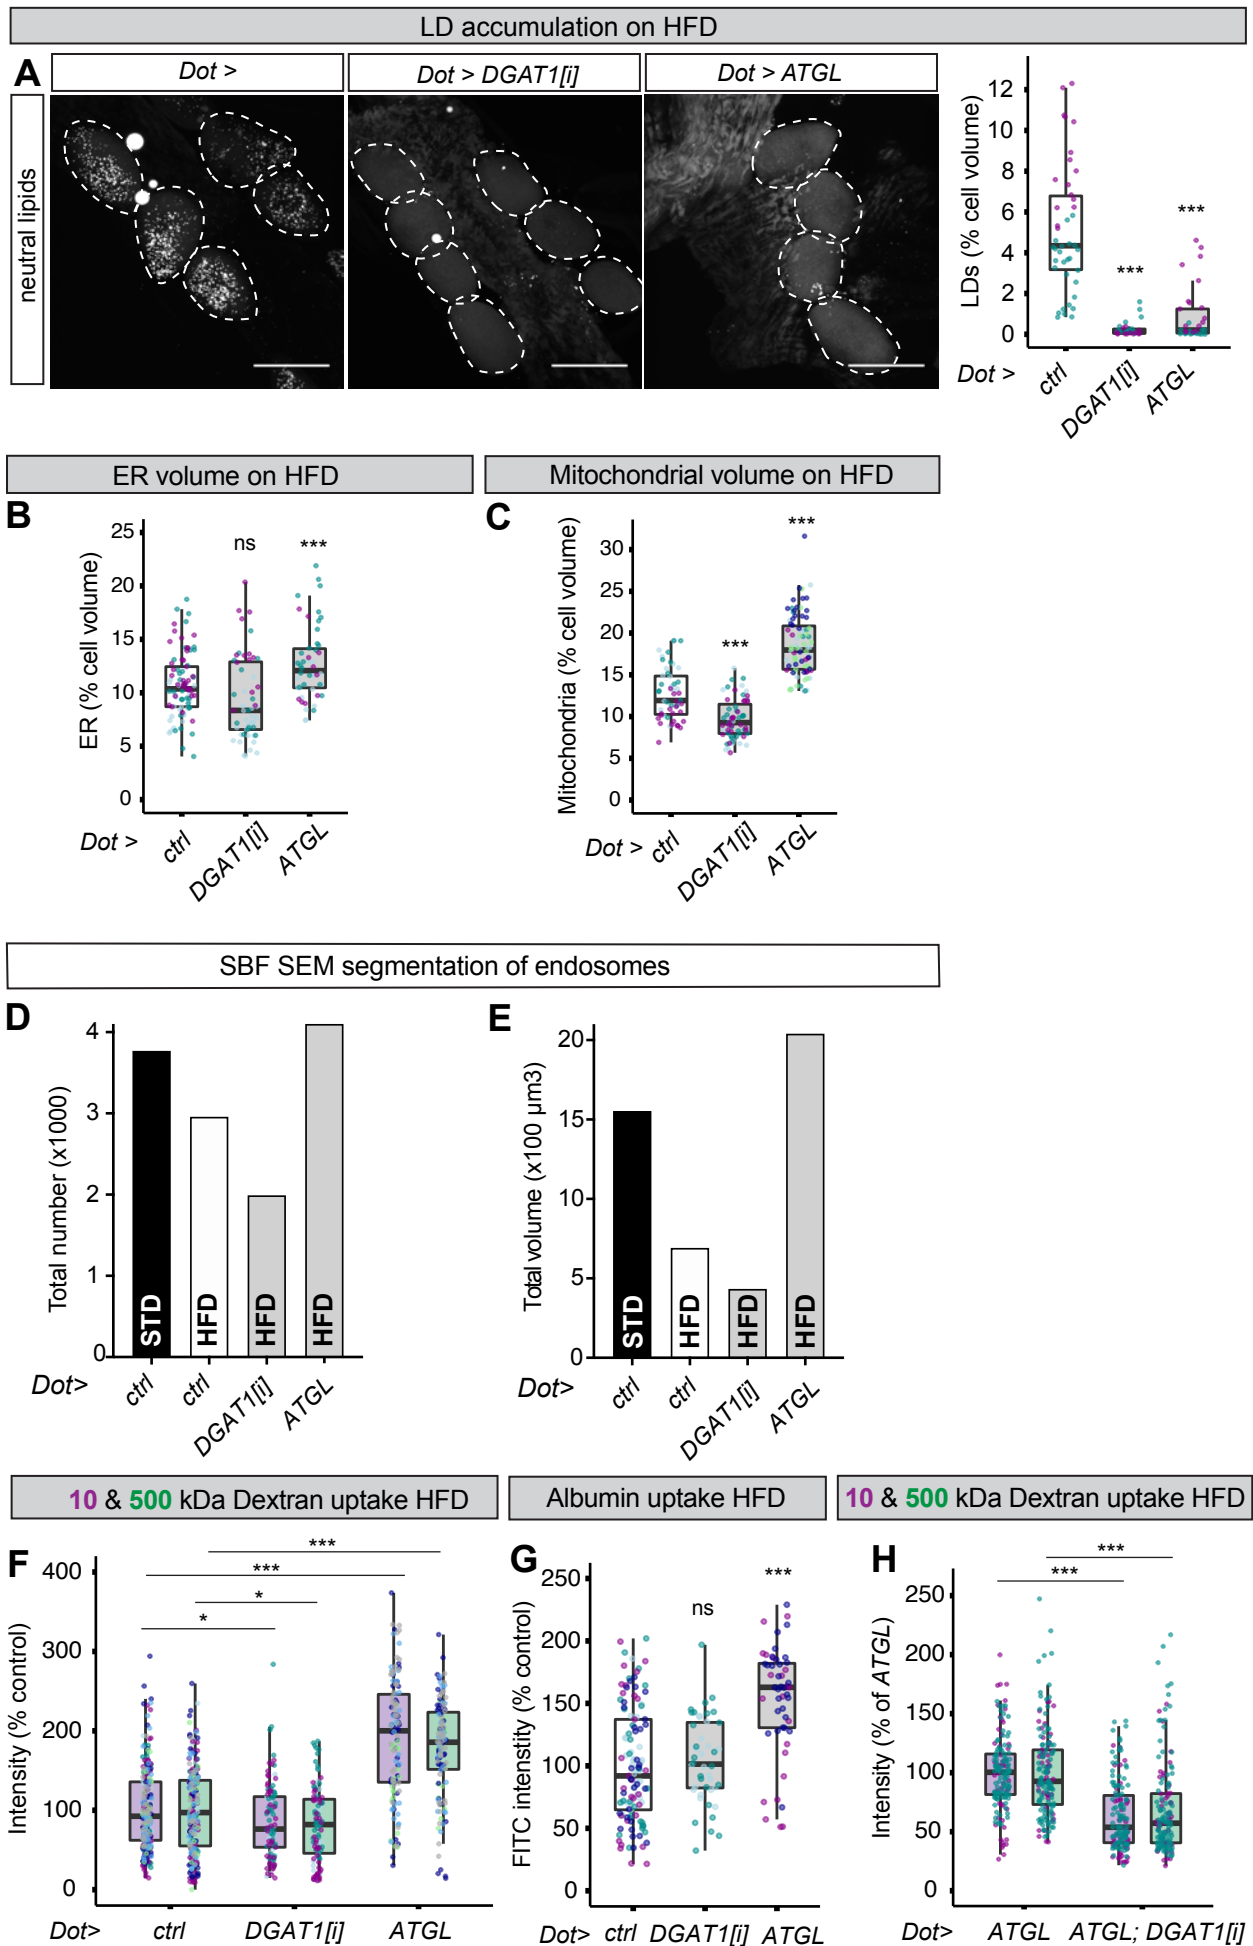

Figure 6

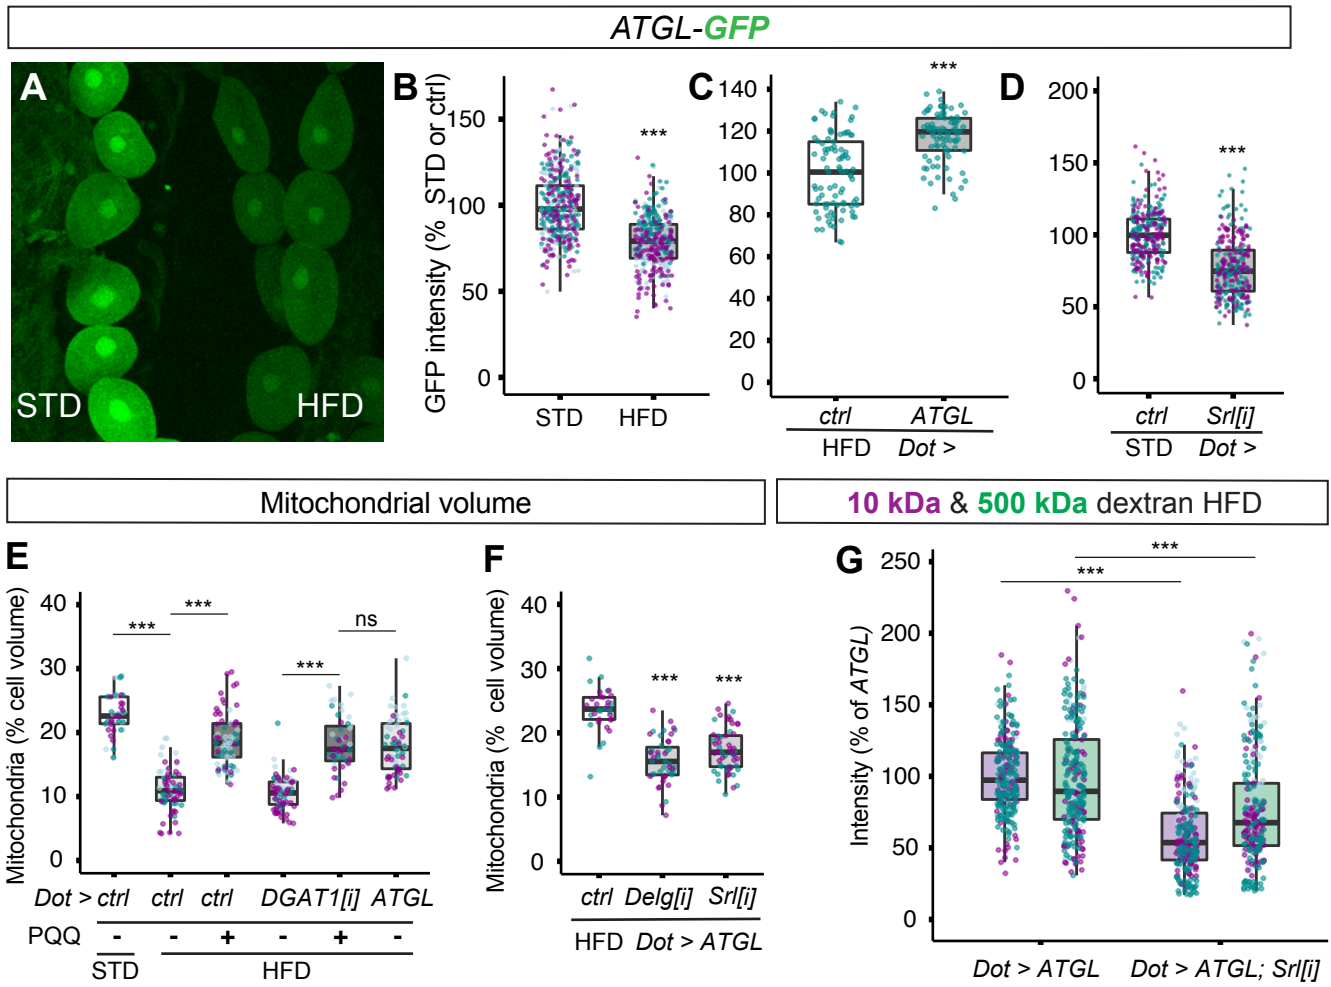

## Figure S1

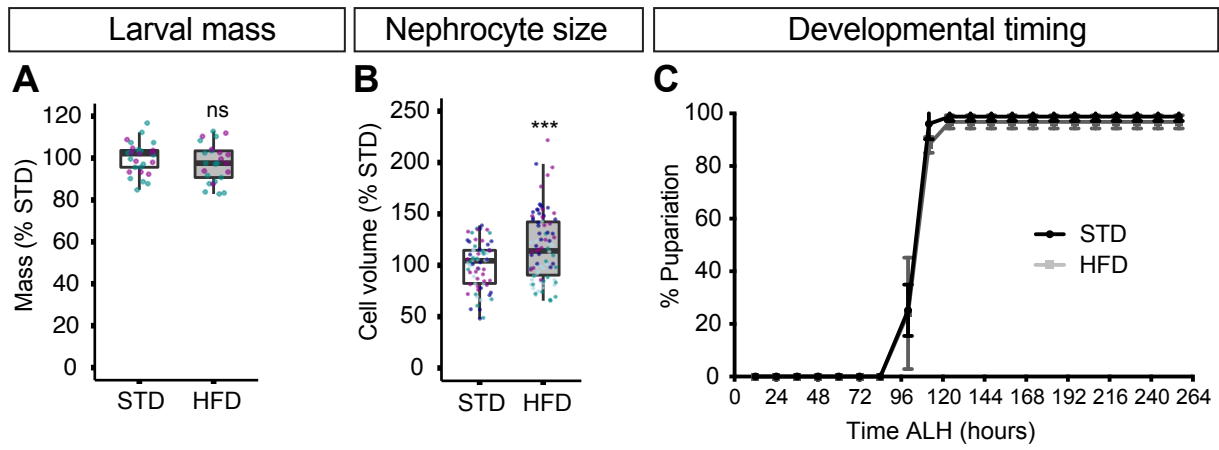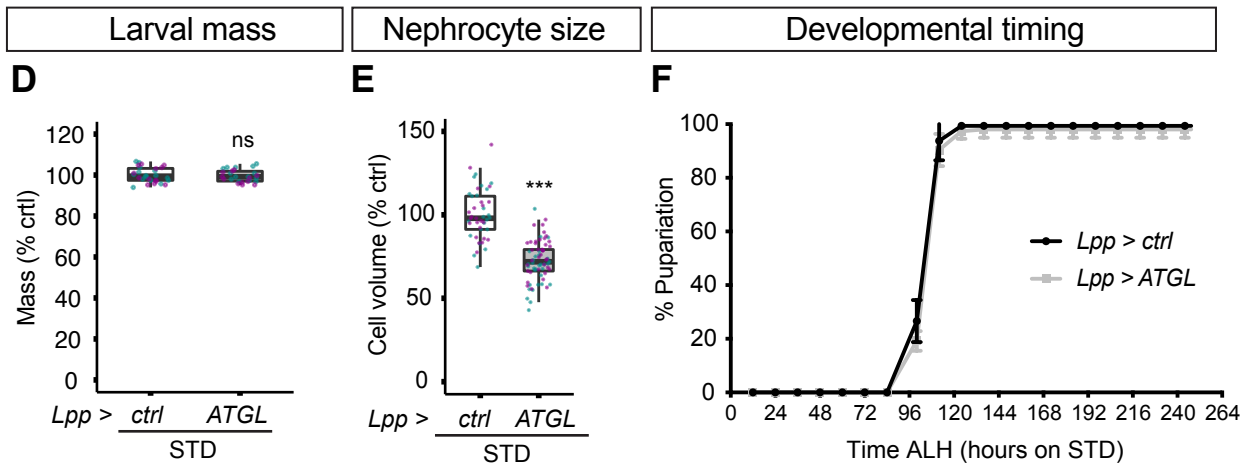



## Figure S2

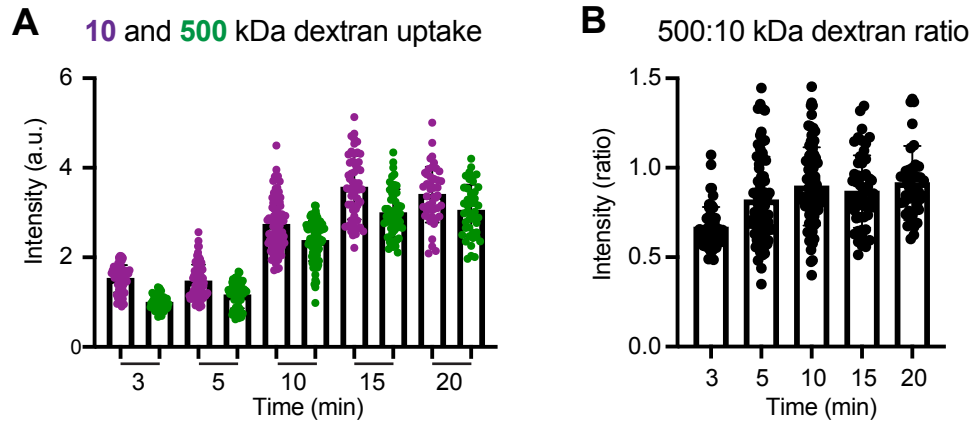

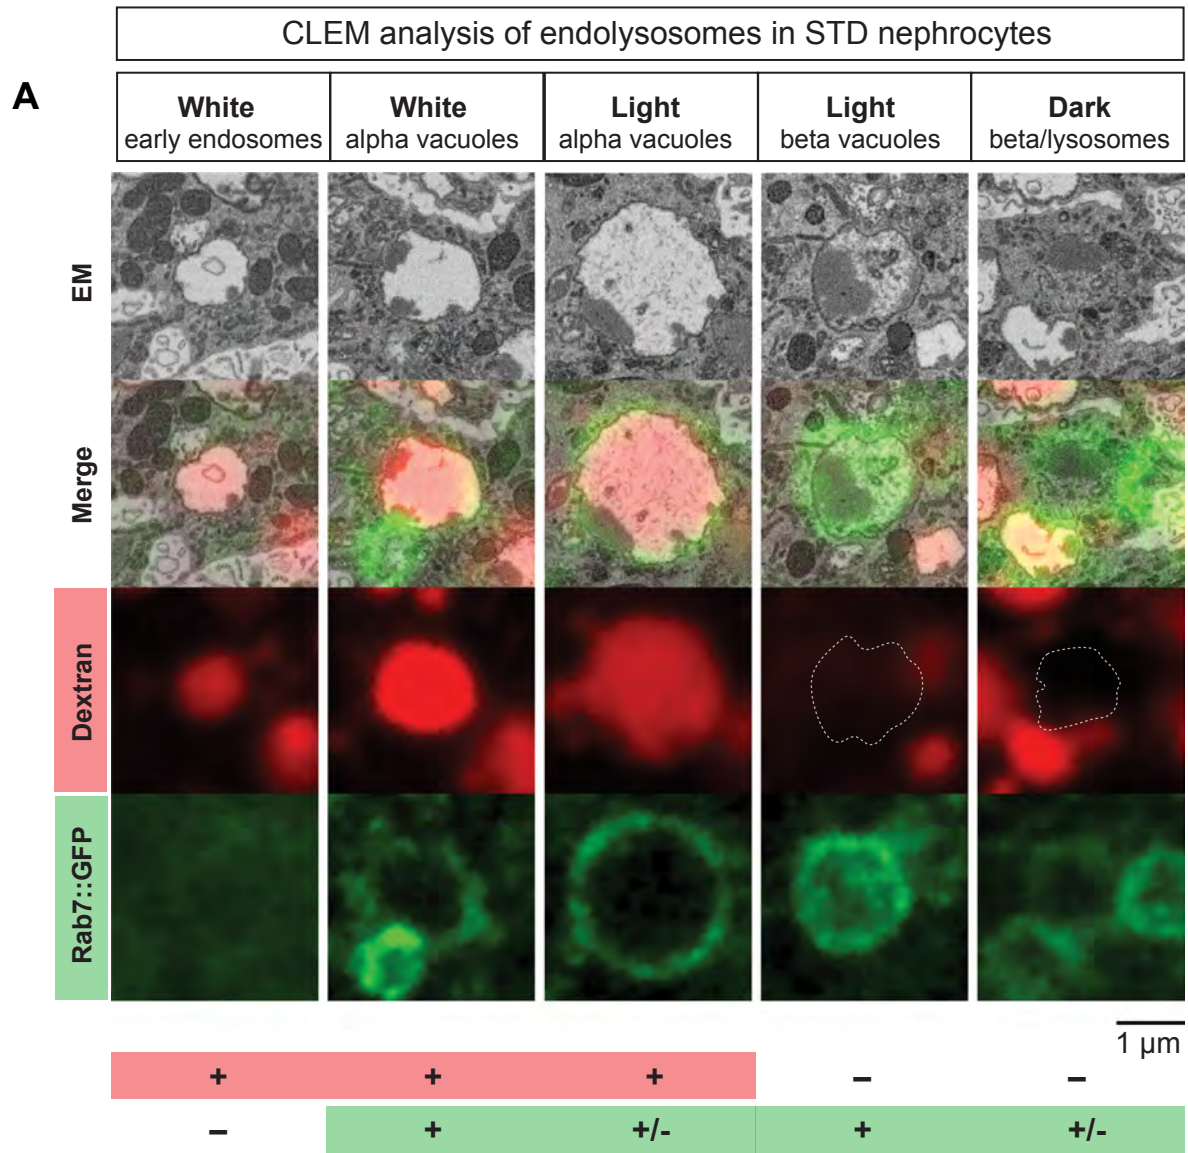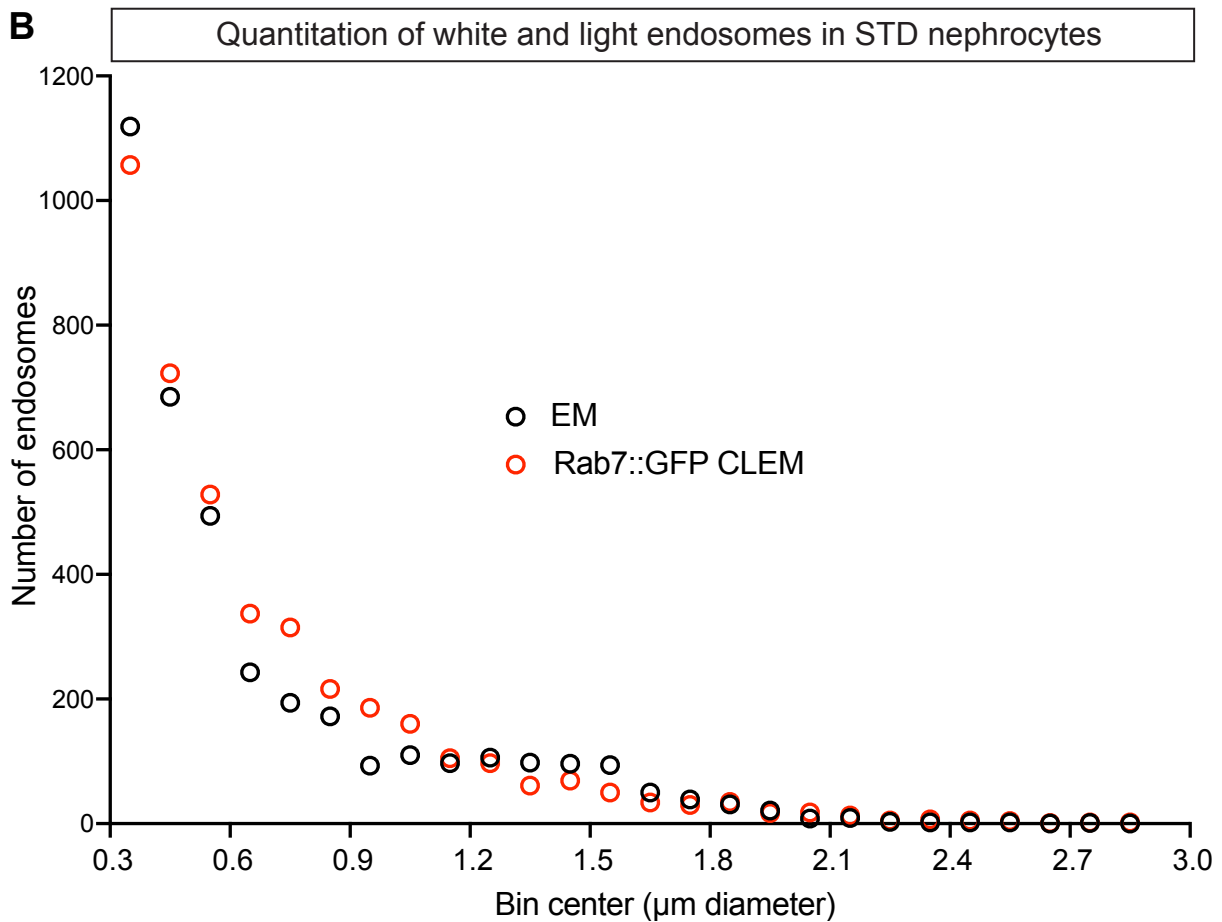

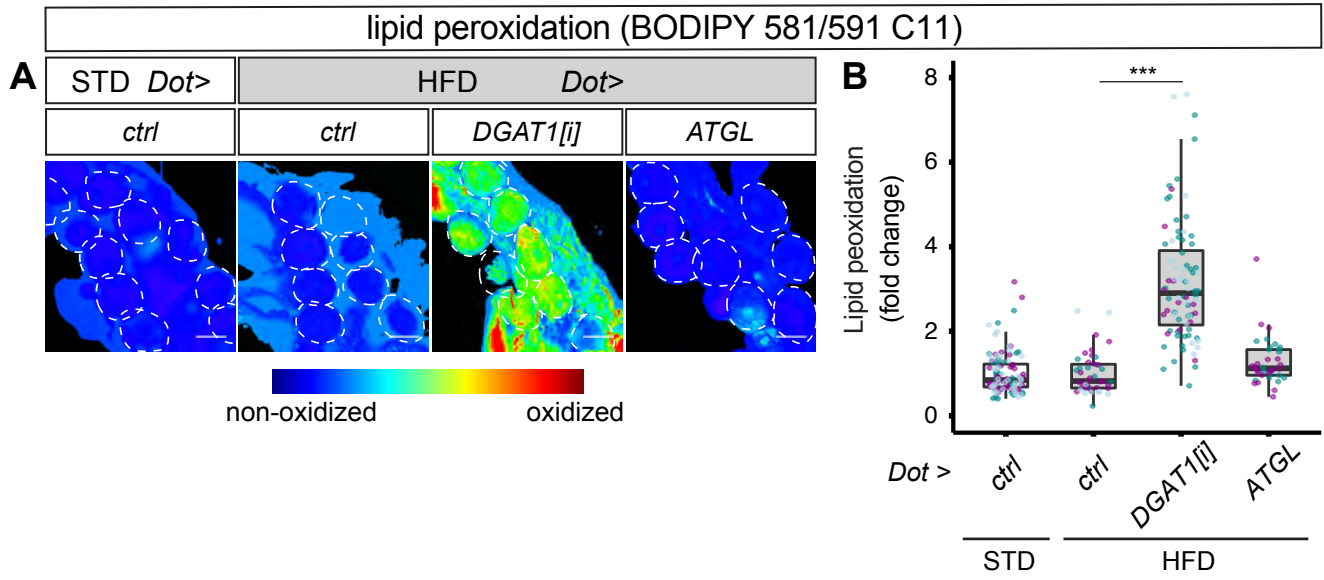

## Figure S5

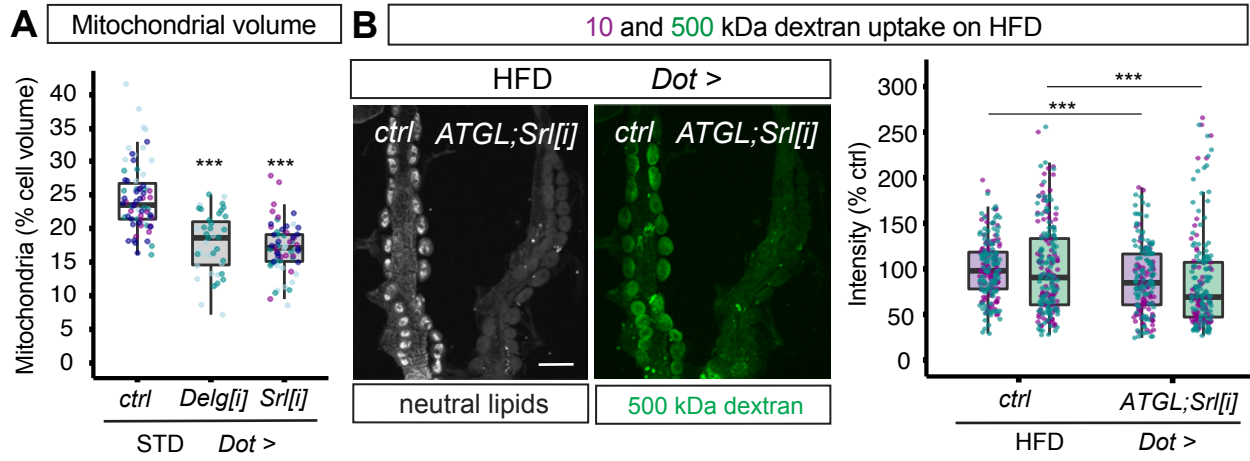

Source: http://biorxiv.org/content/10.1101/2020.11.19.390146v1.full.pdf
